# Supplementary material
Source: PubMed Central journal article supplement (PMC8640607)
Supplement: mmc3.pdf [file mmc3.pdf]

|           |     |               |             |               |                        |                           |                                                                                                                                                                                                                                                                       |
|-----------|-----|---------------|-------------|---------------|------------------------|---------------------------|-----------------------------------------------------------------------------------------------------------------------------------------------------------------------------------------------------------------------------------------------------------------------|
| EPI244409 | NA  | Singapore     | 2009-May-30 | EPI_ISL_70517 | A/Singapore/GN285/2009 | Import from public-domain | Phuah,S.P.; Meng,S.; Yong,T.Y.; Loh,P.L.; Cui,L.; Lin,R.                                                                                                                                                                                                              |
| EPI243952 | PB2 | Russian Feder | 2009-Dec-04 | EPI_ISL_70342 | A/IV-Anadyr/177/2009   | Import from public-domain | Shlyapnikova,O.V.; Poglazov,A.B.; Prilpov,A.G.                                                                                                                                                                                                                        |
| EPI243954 | PA  | Russian Feder | 2009-Dec-04 | EPI_ISL_70342 | A/IV-Anadyr/177/2009   | Import from public-domain | Shlyapnikova,O.V.; Poglazov,A.B.; Prilpov,A.G.                                                                                                                                                                                                                        |
| EPI243955 | HA  | Russian Feder | 2009-Dec-04 | EPI_ISL_70342 | A/IV-Anadyr/177/2009   | Import from public-domain | Shlyapnikova,O.V.; Poglazov,A.B.; Prilpov,A.G.                                                                                                                                                                                                                        |
| EPI243956 | NP  | Russian Feder | 2009-Dec-04 | EPI_ISL_70342 | A/IV-Anadyr/177/2009   | Import from public-domain | Shlyapnikova,O.V.; Poglazov,A.B.; Prilpov,A.G.                                                                                                                                                                                                                        |
| EPI243957 | NA  | Russian Feder | 2009-Dec-04 | EPI_ISL_70342 | A/IV-Anadyr/177/2009   | Import from public-domain | Shlyapnikova,O.V.; Poglazov,A.B.; Prilpov,A.G.                                                                                                                                                                                                                        |
| EPI243958 | MP  | Russian Feder | 2009-Dec-04 | EPI_ISL_70342 | A/IV-Anadyr/177/2009   | Import from public-domain | Shlyapnikova,O.V.; Poglazov,A.B.; Prilpov,A.G.                                                                                                                                                                                                                        |
| EPI243959 | NS  | Russian Feder | 2009-Dec-04 | EPI_ISL_70342 | A/IV-Anadyr/177/2009   | Import from public-domain | Shlyapnikova,O.V.; Poglazov,A.B.; Prilpov,A.G.                                                                                                                                                                                                                        |
| EPI243961 | PB1 | Russian Feder | 2009-Dec-04 | EPI_ISL_70342 | A/IV-Anadyr/177/2009   | Import from public-domain | Shlyapnikova,O.V.; Poglazov,A.B.; Prilpov,A.G.                                                                                                                                                                                                                        |
| EPI241709 | MP  | Russian Feder | 2009-Dec-14 | EPI_ISL_69728 | A/Magadan/02/2009      | Import from public-domain | Susloparov,I.M.; Durymanov,A.G.; Shestopalov,A.M.; Drozdov,I.G.                                                                                                                                                                                                       |
| EPI241710 | NS  | Russian Feder | 2009-Dec-14 | EPI_ISL_69728 | A/Magadan/02/2009      | Import from public-domain | Susloparov,I.M.; Durymanov,A.G.; Shestopalov,A.M.; Drozdov,I.G.                                                                                                                                                                                                       |
| EPI241703 | PB2 | Russian Feder | 2009-Dec-14 | EPI_ISL_69728 | A/Magadan/02/2009      | Import from public-domain | Susloparov,I.M.; Durymanov,A.G.; Shestopalov,A.M.; Drozdov,I.G.                                                                                                                                                                                                       |
| EPI241704 | PB1 | Russian Feder | 2009-Dec-14 | EPI_ISL_69728 | A/Magadan/02/2009      | Import from public-domain | Susloparov,I.M.; Durymanov,A.G.; Shestopalov,A.M.; Drozdov,I.G.                                                                                                                                                                                                       |
| EPI241705 | PA  | Russian Feder | 2009-Dec-14 | EPI_ISL_69728 | A/Magadan/02/2009      | Import from public-domain | Susloparov,I.M.; Durymanov,A.G.; Shestopalov,A.M.; Drozdov,I.G.                                                                                                                                                                                                       |
| EPI241706 | HA  | Russian Feder | 2009-Dec-14 | EPI_ISL_69728 | A/Magadan/02/2009      | Import from public-domain | Susloparov,I.M.; Durymanov,A.G.; Shestopalov,A.M.; Drozdov,I.G.                                                                                                                                                                                                       |
| EPI241707 | NP  | Russian Feder | 2009-Dec-14 | EPI_ISL_69728 | A/Magadan/02/2009      | Import from public-domain | Susloparov,I.M.; Durymanov,A.G.; Shestopalov,A.M.; Drozdov,I.G.                                                                                                                                                                                                       |
| EPI241708 | NA  | Russian Feder | 2009-Dec-14 | EPI_ISL_69728 | A/Magadan/02/2009      | Import from public-domain | Susloparov,I.M.; Durymanov,A.G.; Shestopalov,A.M.; Drozdov,I.G.                                                                                                                                                                                                       |
| EPI241694 | PB2 | Kyrgyzstan    | 2009-Nov-28 | EPI_ISL_69727 | A/Bishkek/03/2009      | Import from public-domain | Susloparov,I.M.; Durymanov,A.G.; Shestopalov,A.M.; Drozdov,I.G.                                                                                                                                                                                                       |
| EPI241696 | PB1 | Kyrgyzstan    | 2009-Nov-28 | EPI_ISL_69727 | A/Bishkek/03/2009      | Import from public-domain | Susloparov,I.M.; Durymanov,A.G.; Shestopalov,A.M.; Drozdov,I.G.                                                                                                                                                                                                       |
| EPI241697 | PA  | Kyrgyzstan    | 2009-Nov-28 | EPI_ISL_69727 | A/Bishkek/03/2009      | Import from public-domain | Susloparov,I.M.; Durymanov,A.G.; Shestopalov,A.M.; Drozdov,I.G.                                                                                                                                                                                                       |
| EPI241698 | HA  | Kyrgyzstan    | 2009-Nov-28 | EPI_ISL_69727 | A/Bishkek/03/2009      | Import from public-domain | Susloparov,I.M.; Durymanov,A.G.; Shestopalov,A.M.; Drozdov,I.G.                                                                                                                                                                                                       |
| EPI241699 | NP  | Kyrgyzstan    | 2009-Nov-28 | EPI_ISL_69727 | A/Bishkek/03/2009      | Import from public-domain | Susloparov,I.M.; Durymanov,A.G.; Shestopalov,A.M.; Drozdov,I.G.                                                                                                                                                                                                       |
| EPI241700 | NA  | Kyrgyzstan    | 2009-Nov-28 | EPI_ISL_69727 | A/Bishkek/03/2009      | Import from public-domain | Susloparov,I.M.; Durymanov,A.G.; Shestopalov,A.M.; Drozdov,I.G.                                                                                                                                                                                                       |
| EPI241701 | MP  | Kyrgyzstan    | 2009-Nov-28 | EPI_ISL_69727 | A/Bishkek/03/2009      | Import from public-domain | Susloparov,I.M.; Durymanov,A.G.; Shestopalov,A.M.; Drozdov,I.G.                                                                                                                                                                                                       |
| EPI241702 | NS  | Kyrgyzstan    | 2009-Nov-28 | EPI_ISL_69727 | A/Bishkek/03/2009      | Import from public-domain | Susloparov,I.M.; Durymanov,A.G.; Shestopalov,A.M.; Drozdov,I.G.                                                                                                                                                                                                       |
| EPI241686 | PB2 | Russian Feder | 2009-Dec-18 | EPI_ISL_69726 | A/Barnaul/04/2009      | Import from public-domain | Susloparov,I.M.; Durymanov,A.G.; Shestopalov,A.M.; Drozdov,I.G.                                                                                                                                                                                                       |
| EPI241687 | PB1 | Russian Feder | 2009-Dec-18 | EPI_ISL_69726 | A/Barnaul/04/2009      | Import from public-domain | Susloparov,I.M.; Durymanov,A.G.; Shestopalov,A.M.; Drozdov,I.G.                                                                                                                                                                                                       |
| EPI241688 | PA  | Russian Feder | 2009-Dec-18 | EPI_ISL_69726 | A/Barnaul/04/2009      | Import from public-domain | Susloparov,I.M.; Durymanov,A.G.; Shestopalov,A.M.; Drozdov,I.G.                                                                                                                                                                                                       |
| EPI241689 | HA  | Russian Feder | 2009-Dec-18 | EPI_ISL_69726 | A/Barnaul/04/2009      | Import from public-domain | Susloparov,I.M.; Durymanov,A.G.; Shestopalov,A.M.; Drozdov,I.G.                                                                                                                                                                                                       |
| EPI241690 | NP  | Russian Feder | 2009-Dec-18 | EPI_ISL_69726 | A/Barnaul/04/2009      | Import from public-domain | Susloparov,I.M.; Durymanov,A.G.; Shestopalov,A.M.; Drozdov,I.G.                                                                                                                                                                                                       |
| EPI241691 | NA  | Russian Feder | 2009-Dec-18 | EPI_ISL_69726 | A/Barnaul/04/2009      | Import from public-domain | Susloparov,I.M.; Durymanov,A.G.; Shestopalov,A.M.; Drozdov,I.G.                                                                                                                                                                                                       |
| EPI241692 | MP  | Russian Feder | 2009-Dec-18 | EPI_ISL_69726 | A/Barnaul/04/2009      | Import from public-domain | Susloparov,I.M.; Durymanov,A.G.; Shestopalov,A.M.; Drozdov,I.G.                                                                                                                                                                                                       |
| EPI241693 | NS  | Russian Feder | 2009-Dec-18 | EPI_ISL_69726 | A/Barnaul/04/2009      | Import from public-domain | Susloparov,I.M.; Durymanov,A.G.; Shestopalov,A.M.; Drozdov,I.G.                                                                                                                                                                                                       |
| EPI234563 | PB2 | Russian Feder | 2009-Nov-01 | EPI_ISL_67086 | A/Russia/61/2009       | Import from public-domain | Akopian,T.A.; Alexeev,D.; Chukin,M.M.; Generozov,E.V.;<br>Govorun,V.M.; Gribanov,O.; Ilina,E.N.; Klimova,E.A.; Kondratov,I.;<br>Kostin,P.A.; Kostryukova,E.S.; Larin,A.E.; Lazarev,V.N.;<br>Levitskii,S.A.; Prilpov,A.G.; Selezneva,O.V.; Yuschuk,N.D.;<br>Zakharjevs |
| EPI234564 | PB1 | Russian Feder | 2009-Nov-01 | EPI_ISL_67086 | A/Russia/61/2009       | Import from public-domain | Akopian,T.A.; Alexeev,D.; Chukin,M.M.; Generozov,E.V.;<br>Govorun,V.M.; Gribanov,O.; Ilina,E.N.; Klimova,E.A.; Kondratov,I.;<br>Kostin,P.A.; Kostryukova,E.S.; Larin,A.E.; Lazarev,V.N.;<br>Levitskii,S.A.; Prilpov,A.G.; Selezneva,O.V.; Yuschuk,N.D.;<br>Zakharjevs |
| EPI234565 | PA  | Russian Feder | 2009-Nov-01 | EPI_ISL_67086 | A/Russia/61/2009       | Import from public-domain | Akopian,T.A.; Alexeev,D.; Chukin,M.M.; Generozov,E.V.;<br>Govorun,V.M.; Gribanov,O.; Ilina,E.N.; Klimova,E.A.; Kondratov,I.;<br>Kostin,P.A.; Kostryukova,E.S.; Larin,A.E.; Lazarev,V.N.;<br>Levitskii,S.A.; Prilpov,A.G.; Selezneva,O.V.; Yuschuk,N.D.;<br>Zakharjevs |
| EPI234566 | HA  | Russian Feder | 2009-Nov-01 | EPI_ISL_67086 | A/Russia/61/2009       | Import from public-domain | Akopian,T.A.; Alexeev,D.; Chukin,M.M.; Generozov,E.V.;<br>Govorun,V.M.; Gribanov,O.; Ilina,E.N.; Klimova,E.A.; Kondratov,I.;<br>Kostin,P.A.; Kostryukova,E.S.; Larin,A.E.; Lazarev,V.N.;<br>Levitskii,S.A.; Prilpov,A.G.; Selezneva,O.V.; Yuschuk,N.D.;<br>Zakharjevs |
| EPI234567 | NP  | Russian Feder | 2009-Nov-01 | EPI_ISL_67086 | A/Russia/61/2009       | Import from public-domain | Akopian,T.A.; Alexeev,D.; Chukin,M.M.; Generozov,E.V.;<br>Govorun,V.M.; Gribanov,O.; Ilina,E.N.; Klimova,E.A.; Kondratov,I.;<br>Kostin,P.A.; Kostryukova,E.S.; Larin,A.E.; Lazarev,V.N.;<br>Levitskii,S.A.; Prilpov,A.G.; Selezneva,O.V.; Yuschuk,N.D.;<br>Zakharjevs |
| EPI234568 | NA  | Russian Feder | 2009-Nov-01 | EPI_ISL_67086 | A/Russia/61/2009       | Import from public-domain | Akopian,T.A.; Alexeev,D.; Chukin,M.M.; Generozov,E.V.;<br>Govorun,V.M.; Gribanov,O.; Ilina,E.N.; Klimova,E.A.; Kondratov,I.;<br>Kostin,P.A.; Kostryukova,E.S.; Larin,A.E.; Lazarev,V.N.;<br>Levitskii,S.A.; Prilpov,A.G.; Selezneva,O.V.; Yuschuk,N.D.;<br>Zakharjevs |







|           |     |                           |               |                       |                           |                                                                                                                                                                                                                                                                                         |
|-----------|-----|---------------------------|---------------|-----------------------|---------------------------|-----------------------------------------------------------------------------------------------------------------------------------------------------------------------------------------------------------------------------------------------------------------------------------------|
| EPI234530 | NS  | Russian Feder 2009-Nov-01 | EPI_ISL_67081 | A/Russia/100/2009     | Import from public-domain | Akopian, T.A.; Alexeev, D.; Chukin, M.M.; Generozov, E.V.;<br>Govorun, V.M.; Griбанov, O.; Ilina, E.N.; Klimova, E.A.; Kondratov, I.;<br>Kostin, P.A.; Kostryukova, E.S.; Larin, A.E.; Lazarev, V.N.;<br>Levitskii, S.A.; Prilipov, A.G.; Selezneva, O.V.; Yuschuk, N.D.;<br>Zakharjevs |
| EPI234523 | PB2 | Russian Feder 2009-Nov-01 | EPI_ISL_67081 | A/Russia/100/2009     | Import from public-domain | Akopian, T.A.; Alexeev, D.; Chukin, M.M.; Generozov, E.V.;<br>Govorun, V.M.; Griбанov, O.; Ilina, E.N.; Klimova, E.A.; Kondratov, I.;<br>Kostin, P.A.; Kostryukova, E.S.; Larin, A.E.; Lazarev, V.N.;<br>Levitskii, S.A.; Prilipov, A.G.; Selezneva, O.V.; Yuschuk, N.D.;<br>Zakharjevs |
| EPI234524 | PB1 | Russian Feder 2009-Nov-01 | EPI_ISL_67081 | A/Russia/100/2009     | Import from public-domain | Akopian, T.A.; Alexeev, D.; Chukin, M.M.; Generozov, E.V.;<br>Govorun, V.M.; Griбанov, O.; Ilina, E.N.; Klimova, E.A.; Kondratov, I.;<br>Kostin, P.A.; Kostryukova, E.S.; Larin, A.E.; Lazarev, V.N.;<br>Levitskii, S.A.; Prilipov, A.G.; Selezneva, O.V.; Yuschuk, N.D.;<br>Zakharjevs |
| EPI234525 | PA  | Russian Feder 2009-Nov-01 | EPI_ISL_67081 | A/Russia/100/2009     | Import from public-domain | Akopian, T.A.; Alexeev, D.; Chukin, M.M.; Generozov, E.V.;<br>Govorun, V.M.; Griбанov, O.; Ilina, E.N.; Klimova, E.A.; Kondratov, I.;<br>Kostin, P.A.; Kostryukova, E.S.; Larin, A.E.; Lazarev, V.N.;<br>Levitskii, S.A.; Prilipov, A.G.; Selezneva, O.V.; Yuschuk, N.D.;<br>Zakharjevs |
| EPI234526 | HA  | Russian Feder 2009-Nov-01 | EPI_ISL_67081 | A/Russia/100/2009     | Import from public-domain | Akopian, T.A.; Alexeev, D.; Chukin, M.M.; Generozov, E.V.;<br>Govorun, V.M.; Griбанov, O.; Ilina, E.N.; Klimova, E.A.; Kondratov, I.;<br>Kostin, P.A.; Kostryukova, E.S.; Larin, A.E.; Lazarev, V.N.;<br>Levitskii, S.A.; Prilipov, A.G.; Selezneva, O.V.; Yuschuk, N.D.;<br>Zakharjevs |
| EPI234527 | NP  | Russian Feder 2009-Nov-01 | EPI_ISL_67081 | A/Russia/100/2009     | Import from public-domain | Akopian, T.A.; Alexeev, D.; Chukin, M.M.; Generozov, E.V.;<br>Govorun, V.M.; Griбанov, O.; Ilina, E.N.; Klimova, E.A.; Kondratov, I.;<br>Kostin, P.A.; Kostryukova, E.S.; Larin, A.E.; Lazarev, V.N.;<br>Levitskii, S.A.; Prilipov, A.G.; Selezneva, O.V.; Yuschuk, N.D.;<br>Zakharjevs |
| EPI234002 | PA  | Russian Feder 2009-Nov-14 | EPI_ISL_66926 | A/Tver/IIV2969/2009   | Import from public-domain | Zhuravleva, M.M.; Prilipov, A.G.                                                                                                                                                                                                                                                        |
| EPI234003 | HA  | Russian Feder 2009-Nov-14 | EPI_ISL_66926 | A/Tver/IIV2969/2009   | Import from public-domain | Zhuravleva, M.M.; Prilipov, A.G.                                                                                                                                                                                                                                                        |
| EPI234004 | PB2 | Russian Feder 2009-Nov-14 | EPI_ISL_66926 | A/Tver/IIV2969/2009   | Import from public-domain | Zhuravleva, M.M.; Prilipov, A.G.                                                                                                                                                                                                                                                        |
| EPI234005 | NA  | Russian Feder 2009-Nov-14 | EPI_ISL_66926 | A/Tver/IIV2969/2009   | Import from public-domain | Zhuravleva, M.M.; Prilipov, A.G.                                                                                                                                                                                                                                                        |
| EPI234006 | NP  | Russian Feder 2009-Nov-14 | EPI_ISL_66926 | A/Tver/IIV2969/2009   | Import from public-domain | Zhuravleva, M.M.; Prilipov, A.G.                                                                                                                                                                                                                                                        |
| EPI234007 | PB1 | Russian Feder 2009-Nov-14 | EPI_ISL_66926 | A/Tver/IIV2969/2009   | Import from public-domain | Zhuravleva, M.M.; Prilipov, A.G.                                                                                                                                                                                                                                                        |
| EPI234008 | MP  | Russian Feder 2009-Nov-14 | EPI_ISL_66926 | A/Tver/IIV2969/2009   | Import from public-domain | Zhuravleva, M.M.; Prilipov, A.G.                                                                                                                                                                                                                                                        |
| EPI234009 | NS  | Russian Feder 2009-Nov-14 | EPI_ISL_66926 | A/Tver/IIV2969/2009   | Import from public-domain | Zhuravleva, M.M.; Prilipov, A.G.                                                                                                                                                                                                                                                        |
| EPI233320 | HA  | Russian Feder 2009-Jul-21 | EPI_ISL_66840 | A/Novosibirsk/02/2009 | Import from public-domain | Susloparov, I.M.; Sharshov, K.A.; Durymanov, A.G.; Shestopalov, A.M.;<br>Drozdov, I.G.                                                                                                                                                                                                  |
| EPI233321 | MP  | Russian Feder 2009-Jul-21 | EPI_ISL_66840 | A/Novosibirsk/02/2009 | Import from public-domain | Susloparov, I.M.; Sharshov, K.A.; Durymanov, A.G.; Shestopalov, A.M.;<br>Drozdov, I.G.                                                                                                                                                                                                  |
| EPI233322 | NA  | Russian Feder 2009-Jul-21 | EPI_ISL_66840 | A/Novosibirsk/02/2009 | Import from public-domain | Susloparov, I.M.; Sharshov, K.A.; Durymanov, A.G.; Shestopalov, A.M.;<br>Drozdov, I.G.                                                                                                                                                                                                  |
| EPI233323 | NP  | Russian Feder 2009-Jul-21 | EPI_ISL_66840 | A/Novosibirsk/02/2009 | Import from public-domain | Susloparov, I.M.; Sharshov, K.A.; Durymanov, A.G.; Shestopalov, A.M.;<br>Drozdov, I.G.                                                                                                                                                                                                  |
| EPI233324 | NS  | Russian Feder 2009-Jul-21 | EPI_ISL_66840 | A/Novosibirsk/02/2009 | Import from public-domain | Susloparov, I.M.; Sharshov, K.A.; Durymanov, A.G.; Shestopalov, A.M.;<br>Drozdov, I.G.                                                                                                                                                                                                  |
| EPI233325 | PA  | Russian Feder 2009-Jul-21 | EPI_ISL_66840 | A/Novosibirsk/02/2009 | Import from public-domain | Susloparov, I.M.; Sharshov, K.A.; Durymanov, A.G.; Shestopalov, A.M.;<br>Drozdov, I.G.                                                                                                                                                                                                  |
| EPI233326 | PB1 | Russian Feder 2009-Jul-21 | EPI_ISL_66840 | A/Novosibirsk/02/2009 | Import from public-domain | Susloparov, I.M.; Sharshov, K.A.; Durymanov, A.G.; Shestopalov, A.M.;<br>Drozdov, I.G.                                                                                                                                                                                                  |
| EPI233327 | PB2 | Russian Feder 2009-Jul-21 | EPI_ISL_66840 | A/Novosibirsk/02/2009 | Import from public-domain | Susloparov, I.M.; Sharshov, K.A.; Durymanov, A.G.; Shestopalov, A.M.;<br>Drozdov, I.G.                                                                                                                                                                                                  |
| EPI233313 | MP  | Russian Feder 2009-Jul-19 | EPI_ISL_66839 | A/Tomsk/03/2009       | Import from public-domain | Susloparov, I.M.; Sharshov, K.A.; Durymanov, A.G.; Shestopalov, A.M.;<br>Drozdov, I.G.                                                                                                                                                                                                  |
| EPI233314 | NA  | Russian Feder 2009-Jul-19 | EPI_ISL_66839 | A/Tomsk/03/2009       | Import from public-domain | Susloparov, I.M.; Sharshov, K.A.; Durymanov, A.G.; Shestopalov, A.M.;<br>Drozdov, I.G.                                                                                                                                                                                                  |
| EPI233315 | NP  | Russian Feder 2009-Jul-19 | EPI_ISL_66839 | A/Tomsk/03/2009       | Import from public-domain | Susloparov, I.M.; Sharshov, K.A.; Durymanov, A.G.; Shestopalov, A.M.;<br>Drozdov, I.G.                                                                                                                                                                                                  |
| EPI233316 | NS  | Russian Feder 2009-Jul-19 | EPI_ISL_66839 | A/Tomsk/03/2009       | Import from public-domain | Susloparov, I.M.; Sharshov, K.A.; Durymanov, A.G.; Shestopalov, A.M.;<br>Drozdov, I.G.                                                                                                                                                                                                  |
| EPI233317 | PA  | Russian Feder 2009-Jul-19 | EPI_ISL_66839 | A/Tomsk/03/2009       | Import from public-domain | Susloparov, I.M.; Sharshov, K.A.; Durymanov, A.G.; Shestopalov, A.M.;<br>Drozdov, I.G.                                                                                                                                                                                                  |









|           |     |                           |               |                         |                           |                                                                                                                                                                                                                                        |
|-----------|-----|---------------------------|---------------|-------------------------|---------------------------|----------------------------------------------------------------------------------------------------------------------------------------------------------------------------------------------------------------------------------------|
| EPI230403 | MP  | Russian Feder 2009-Nov-01 | EPI_ISL_66045 | A/Russia/178/2009       | Import from public-domain | Alexeev,D.; Chukin,M.M.; Generozov,E.V.; Govorun,V.M.; Gribanov,O.; Ilina,E.N.; Klimova,E.A.; Kondratov,I.; Kostin,P.A.; Kostryukova,E.S.; Larin,A.E.; Lazarev,V.N.; Levitskii,S.A.; Prilipov,A.G.; Yuschuk,N.D.; Zakharijevskaya,N.B. |
| EPI230404 | NS  | Russian Feder 2009-Nov-01 | EPI_ISL_66045 | A/Russia/178/2009       | Import from public-domain | Alexeev,D.; Chukin,M.M.; Generozov,E.V.; Govorun,V.M.; Gribanov,O.; Ilina,E.N.; Klimova,E.A.; Kondratov,I.; Kostin,P.A.; Kostryukova,E.S.; Larin,A.E.; Lazarev,V.N.; Levitskii,S.A.; Prilipov,A.G.; Yuschuk,N.D.; Zakharijevskaya,N.B. |
| EPI230298 | PB2 | Russian Feder 2009-Jan-01 | EPI_ISL_66019 | A/Tomsk/07/2009         | Import from public-domain | Temovoi,V.A.; Agafonov,A.P.; Shikov,A.N.; Sementsova,A.O.; Demina,O.K.; Sergeev,A.A.; Drozdov,I.G.                                                                                                                                     |
| EPI230299 | PB1 | Russian Feder 2009-Jan-01 | EPI_ISL_66019 | A/Tomsk/07/2009         | Import from public-domain | Temovoi,V.A.; Agafonov,A.P.; Shikov,A.N.; Sementsova,A.O.; Demina,O.K.; Sergeev,A.A.; Drozdov,I.G.                                                                                                                                     |
| EPI230300 | PA  | Russian Feder 2009-Jan-01 | EPI_ISL_66019 | A/Tomsk/07/2009         | Import from public-domain | Temovoi,V.A.; Agafonov,A.P.; Shikov,A.N.; Sementsova,A.O.; Demina,O.K.; Sergeev,A.A.; Drozdov,I.G.                                                                                                                                     |
| EPI230301 | HA  | Russian Feder 2009-Jan-01 | EPI_ISL_66019 | A/Tomsk/07/2009         | Import from public-domain | Temovoi,V.A.; Agafonov,A.P.; Shikov,A.N.; Sementsova,A.O.; Demina,O.K.; Sergeev,A.A.; Drozdov,I.G.                                                                                                                                     |
| EPI230302 | NP  | Russian Feder 2009-Jan-01 | EPI_ISL_66019 | A/Tomsk/07/2009         | Import from public-domain | Temovoi,V.A.; Agafonov,A.P.; Shikov,A.N.; Sementsova,A.O.; Demina,O.K.; Sergeev,A.A.; Drozdov,I.G.                                                                                                                                     |
| EPI230303 | NA  | Russian Feder 2009-Jan-01 | EPI_ISL_66019 | A/Tomsk/07/2009         | Import from public-domain | Temovoi,V.A.; Agafonov,A.P.; Shikov,A.N.; Sementsova,A.O.; Demina,O.K.; Sergeev,A.A.; Drozdov,I.G.                                                                                                                                     |
| EPI230304 | MP  | Russian Feder 2009-Jan-01 | EPI_ISL_66019 | A/Tomsk/07/2009         | Import from public-domain | Temovoi,V.A.; Agafonov,A.P.; Shikov,A.N.; Sementsova,A.O.; Demina,O.K.; Sergeev,A.A.; Drozdov,I.G.                                                                                                                                     |
| EPI230305 | NS  | Russian Feder 2009-Jan-01 | EPI_ISL_66019 | A/Tomsk/07/2009         | Import from public-domain | Temovoi,V.A.; Agafonov,A.P.; Shikov,A.N.; Sementsova,A.O.; Demina,O.K.; Sergeev,A.A.; Drozdov,I.G.                                                                                                                                     |
| EPI230290 | PB2 | Russian Feder 2009-Jan-01 | EPI_ISL_66018 | A/Salekhard/01/2009     | Import from public-domain | Temovoi,V.A.; Agafonov,A.P.; Shikov,A.N.; Sementsova,A.O.; Demina,O.K.; Sergeev,A.A.; Drozdov,I.G.                                                                                                                                     |
| EPI230291 | PB1 | Russian Feder 2009-Jan-01 | EPI_ISL_66018 | A/Salekhard/01/2009     | Import from public-domain | Temovoi,V.A.; Agafonov,A.P.; Shikov,A.N.; Sementsova,A.O.; Demina,O.K.; Sergeev,A.A.; Drozdov,I.G.                                                                                                                                     |
| EPI230292 | PA  | Russian Feder 2009-Jan-01 | EPI_ISL_66018 | A/Salekhard/01/2009     | Import from public-domain | Temovoi,V.A.; Agafonov,A.P.; Shikov,A.N.; Sementsova,A.O.; Demina,O.K.; Sergeev,A.A.; Drozdov,I.G.                                                                                                                                     |
| EPI230293 | HA  | Russian Feder 2009-Jan-01 | EPI_ISL_66018 | A/Salekhard/01/2009     | Import from public-domain | Temovoi,V.A.; Agafonov,A.P.; Shikov,A.N.; Sementsova,A.O.; Demina,O.K.; Sergeev,A.A.; Drozdov,I.G.                                                                                                                                     |
| EPI230294 | NP  | Russian Feder 2009-Jan-01 | EPI_ISL_66018 | A/Salekhard/01/2009     | Import from public-domain | Temovoi,V.A.; Agafonov,A.P.; Shikov,A.N.; Sementsova,A.O.; Demina,O.K.; Sergeev,A.A.; Drozdov,I.G.                                                                                                                                     |
| EPI230295 | NA  | Russian Feder 2009-Jan-01 | EPI_ISL_66018 | A/Salekhard/01/2009     | Import from public-domain | Temovoi,V.A.; Agafonov,A.P.; Shikov,A.N.; Sementsova,A.O.; Demina,O.K.; Sergeev,A.A.; Drozdov,I.G.                                                                                                                                     |
| EPI230296 | MP  | Russian Feder 2009-Jan-01 | EPI_ISL_66018 | A/Salekhard/01/2009     | Import from public-domain | Temovoi,V.A.; Agafonov,A.P.; Shikov,A.N.; Sementsova,A.O.; Demina,O.K.; Sergeev,A.A.; Drozdov,I.G.                                                                                                                                     |
| EPI230297 | NS  | Russian Feder 2009-Jan-01 | EPI_ISL_66018 | A/Salekhard/01/2009     | Import from public-domain | Temovoi,V.A.; Agafonov,A.P.; Shikov,A.N.; Sementsova,A.O.; Demina,O.K.; Sergeev,A.A.; Drozdov,I.G.                                                                                                                                     |
| EPI230275 | PB2 | Russian Feder 2009-Jan-01 | EPI_ISL_66015 | A/Orenburg/11V2974/2009 | Import from public-domain | Poglazov,A.B.; Shlyapnikova,O.V.; Prilipov,A.G.; Samokhvalov,E.I.                                                                                                                                                                      |
| EPI230276 | PA  | Russian Feder 2009-Jan-01 | EPI_ISL_66015 | A/Orenburg/11V2974/2009 | Import from public-domain | Poglazov,A.B.; Shlyapnikova,O.V.; Prilipov,A.G.; Samokhvalov,E.I.                                                                                                                                                                      |
| EPI230277 | HA  | Russian Feder 2009-Jan-01 | EPI_ISL_66015 | A/Orenburg/11V2974/2009 | Import from public-domain | Poglazov,A.B.; Shlyapnikova,O.V.; Prilipov,A.G.; Samokhvalov,E.I.                                                                                                                                                                      |
| EPI230278 | NP  | Russian Feder 2009-Jan-01 | EPI_ISL_66015 | A/Orenburg/11V2974/2009 | Import from public-domain | Poglazov,A.B.; Shlyapnikova,O.V.; Prilipov,A.G.; Samokhvalov,E.I.                                                                                                                                                                      |
| EPI230279 | NA  | Russian Feder 2009-Jan-01 | EPI_ISL_66015 | A/Orenburg/11V2974/2009 | Import from public-domain | Poglazov,A.B.; Shlyapnikova,O.V.; Prilipov,A.G.; Samokhvalov,E.I.                                                                                                                                                                      |
| EPI230280 | MP  | Russian Feder 2009-Jan-01 | EPI_ISL_66015 | A/Orenburg/11V2974/2009 | Import from public-domain | Poglazov,A.B.; Shlyapnikova,O.V.; Prilipov,A.G.; Samokhvalov,E.I.                                                                                                                                                                      |
| EPI230281 | NS  | Russian Feder 2009-Jan-01 | EPI_ISL_66015 | A/Orenburg/11V2974/2009 | Import from public-domain | Poglazov,A.B.; Shlyapnikova,O.V.; Prilipov,A.G.; Samokhvalov,E.I.                                                                                                                                                                      |
| EPI238714 | PB1 | Russian Feder 2009-Jan-01 | EPI_ISL_66015 | A/Orenburg/11V2974/2009 | Import from public-domain | Poglazov,A.B.; Shlyapnikova,O.V.; Prilipov,A.G.; Samokhvalov,E.I.                                                                                                                                                                      |
| EPI229779 | PB1 | Taiwan 2009-Sep-18        | EPI_ISL_65722 | A/Taiwan/177/2009       | Import from public-domain | Tsao,K.-C.; Huang,Y.-L.; Mok,C.-K.; Huang,C.-G.; Lin,T.-Y.; Shih,S.-R.                                                                                                                                                                 |
| EPI229780 | PA  | Taiwan 2009-Sep-18        | EPI_ISL_65722 | A/Taiwan/177/2009       | Import from public-domain | Tsao,K.-C.; Huang,Y.-L.; Mok,C.-K.; Huang,C.-G.; Lin,T.-Y.; Shih,S.-R.                                                                                                                                                                 |
| EPI229781 | HA  | Taiwan 2009-Sep-18        | EPI_ISL_65722 | A/Taiwan/177/2009       | Import from public-domain | Tsao,K.-C.; Huang,Y.-L.; Mok,C.-K.; Huang,C.-G.; Lin,T.-Y.; Shih,S.-R.                                                                                                                                                                 |
| EPI229782 | NP  | Taiwan 2009-Sep-18        | EPI_ISL_65722 | A/Taiwan/177/2009       | Import from public-domain | Tsao,K.-C.; Huang,Y.-L.; Mok,C.-K.; Huang,C.-G.; Lin,T.-Y.; Shih,S.-R.                                                                                                                                                                 |
| EPI229783 | NA  | Taiwan 2009-Sep-18        | EPI_ISL_65722 | A/Taiwan/177/2009       | Import from public-domain | Tsao,K.-C.; Huang,Y.-L.; Mok,C.-K.; Huang,C.-G.; Lin,T.-Y.; Shih,S.-R.                                                                                                                                                                 |
| EPI229784 | MP  | Taiwan 2009-Sep-18        | EPI_ISL_65722 | A/Taiwan/177/2009       | Import from public-domain | Tsao,K.-C.; Huang,Y.-L.; Mok,C.-K.; Huang,C.-G.; Lin,T.-Y.; Shih,S.-R.                                                                                                                                                                 |
| EPI229785 | NS  | Taiwan 2009-Sep-18        | EPI_ISL_65722 | A/Taiwan/177/2009       | Import from public-domain | Tsao,K.-C.; Huang,Y.-L.; Mok,C.-K.; Huang,C.-G.; Lin,T.-Y.; Shih,S.-R.                                                                                                                                                                 |
| EPI229778 | PB2 | Taiwan 2009-Sep-18        | EPI_ISL_65722 | A/Taiwan/177/2009       | Import from public-domain | Tsao,K.-C.; Huang,Y.-L.; Mok,C.-K.; Huang,C.-G.; Lin,T.-Y.; Shih,S.-R.                                                                                                                                                                 |























































|           |     |              |             |               |                              |                           |                                                                                                                                         |
|-----------|-----|--------------|-------------|---------------|------------------------------|---------------------------|-----------------------------------------------------------------------------------------------------------------------------------------|
| EPI230284 | PB1 | Kazakhstan   | 2009-Jan-01 | EPI_ISL_62418 | A/Almati/01/2009             | Import from public-domain | Temovoi,V.A.; Agafonov,A.P.; Shikov,A.N.; Sementsova,A.O.; Demina,O.K.; Sergeev,A.A.; Drozdov,I.G.                                      |
| EPI230285 | PA  | Kazakhstan   | 2009-Jan-01 | EPI_ISL_62418 | A/Almati/01/2009             | Import from public-domain | Temovoi,V.A.; Agafonov,A.P.; Shikov,A.N.; Sementsova,A.O.; Demina,O.K.; Sergeev,A.A.; Drozdov,I.G.                                      |
| EPI230286 | NP  | Kazakhstan   | 2009-Jan-01 | EPI_ISL_62418 | A/Almati/01/2009             | Import from public-domain | Temovoi,V.A.; Agafonov,A.P.; Shikov,A.N.; Sementsova,A.O.; Demina,O.K.; Sergeev,A.A.; Drozdov,I.G.                                      |
| EPI230287 | NS  | Kazakhstan   | 2009-Jan-01 | EPI_ISL_62418 | A/Almati/01/2009             | Import from public-domain | Temovoi,V.A.; Agafonov,A.P.; Shikov,A.N.; Sementsova,A.O.; Demina,O.K.; Sergeev,A.A.; Drozdov,I.G.                                      |
| EPI217344 | HA  | Kazakhstan   | 2009-Jan-01 | EPI_ISL_62418 | A/Almati/01/2009             | Import from public-domain | Temovoi,V.A.; Agafonov,A.P.; Shikov,A.N.; Sementsova,A.O.; Demina,O.K.; Sergeev,A.A.; Drozdov,I.G.                                      |
| EPI217345 | MP  | Kazakhstan   | 2009-Jan-01 | EPI_ISL_62418 | A/Almati/01/2009             | Import from public-domain | Temovoi,V.A.; Agafonov,A.P.; Shikov,A.N.; Sementsova,A.O.; Demina,O.K.; Sergeev,A.A.; Drozdov,I.G.                                      |
| EPI217346 | NA  | Kazakhstan   | 2009-Jan-01 | EPI_ISL_62418 | A/Almati/01/2009             | Import from public-domain | Temovoi,V.A.; Agafonov,A.P.; Shikov,A.N.; Sementsova,A.O.; Demina,O.K.; Sergeev,A.A.; Drozdov,I.G.                                      |
| EPI234510 | PB2 | Kazakhstan   | 2009-Jan-01 | EPI_ISL_62418 | A/Almati/01/2009             | Import from public-domain | Temovoi,V.A.; Agafonov,A.P.; Shikov,A.N.; Sementsova,A.O.; Demina,O.K.; Sergeev,A.A.; Drozdov,I.G.                                      |
| EPI215544 | PB2 | China        | 2009-May-17 | EPI_ISL_61869 | A/GuangzhouSB/01/2009        | Import from public-domain | Li,X.; Zhao,X.; Zou,S.; Li,L.; Lan,Y.; Cheng,Y.; Tan,M.; Li,X.; Wen,L.; Wang,D.; Li,D.; Shu,Y.                                          |
| EPI215545 | PB1 | China        | 2009-May-17 | EPI_ISL_61869 | A/GuangzhouSB/01/2009        | Import from public-domain | Li,X.; Zhao,X.; Zou,S.; Li,L.; Lan,Y.; Cheng,Y.; Tan,M.; Li,X.; Wen,L.; Wang,D.; Li,D.; Shu,Y.                                          |
| EPI215546 | PA  | China        | 2009-May-17 | EPI_ISL_61869 | A/GuangzhouSB/01/2009        | Import from public-domain | Li,X.; Zhao,X.; Zou,S.; Li,L.; Lan,Y.; Cheng,Y.; Tan,M.; Li,X.; Wen,L.; Wang,D.; Li,D.; Shu,Y.                                          |
| EPI215547 | HA  | China        | 2009-May-17 | EPI_ISL_61869 | A/GuangzhouSB/01/2009        | Import from public-domain | Li,X.; Zhao,X.; Zou,S.; Li,L.; Lan,Y.; Cheng,Y.; Tan,M.; Li,X.; Wen,L.; Wang,D.; Li,D.; Shu,Y.                                          |
| EPI215548 | NP  | China        | 2009-May-17 | EPI_ISL_61869 | A/GuangzhouSB/01/2009        | Import from public-domain | Li,X.; Zhao,X.; Zou,S.; Li,L.; Lan,Y.; Cheng,Y.; Tan,M.; Li,X.; Wen,L.; Wang,D.; Li,D.; Shu,Y.                                          |
| EPI215549 | NA  | China        | 2009-May-17 | EPI_ISL_61869 | A/GuangzhouSB/01/2009        | Import from public-domain | Li,X.; Zhao,X.; Zou,S.; Li,L.; Lan,Y.; Cheng,Y.; Tan,M.; Li,X.; Wen,L.; Wang,D.; Li,D.; Shu,Y.                                          |
| EPI215550 | MP  | China        | 2009-May-17 | EPI_ISL_61869 | A/GuangzhouSB/01/2009        | Import from public-domain | Li,X.; Zhao,X.; Zou,S.; Li,L.; Lan,Y.; Cheng,Y.; Tan,M.; Li,X.; Wen,L.; Wang,D.; Li,D.; Shu,Y.                                          |
| EPI215551 | NS  | China        | 2009-May-17 | EPI_ISL_61869 | A/GuangzhouSB/01/2009        | Import from public-domain | Li,X.; Zhao,X.; Zou,S.; Li,L.; Lan,Y.; Cheng,Y.; Tan,M.; Li,X.; Wen,L.; Wang,D.; Li,D.; Shu,Y.                                          |
| EPI215471 | PB2 | Taiwan       | 2009-Jul-10 | EPI_ISL_61844 | A/Taiwan/T0826/2009          | Import from public-domain | Houng,H.-S.H.; Li,T.; Verratti,K.; Gong,H.; Zhou,Y.; Lipkin,W.I.; Street,C.; Seriwatana,J.; Lyons,A.G.; Keyes,J.; Yun,T.; Kuschner,R.A. |
| EPI215472 | PB1 | Taiwan       | 2009-Jul-10 | EPI_ISL_61844 | A/Taiwan/T0826/2009          | Import from public-domain | Houng,H.-S.H.; Li,T.; Verratti,K.; Gong,H.; Zhou,Y.; Lipkin,W.I.; Street,C.; Seriwatana,J.; Lyons,A.G.; Keyes,J.; Yun,T.; Kuschner,R.A. |
| EPI215473 | PA  | Taiwan       | 2009-Jul-10 | EPI_ISL_61844 | A/Taiwan/T0826/2009          | Import from public-domain | Houng,H.-S.H.; Li,T.; Verratti,K.; Gong,H.; Zhou,Y.; Lipkin,W.I.; Street,C.; Seriwatana,J.; Lyons,A.G.; Keyes,J.; Yun,T.; Kuschner,R.A. |
| EPI215474 | HA  | Taiwan       | 2009-Jul-10 | EPI_ISL_61844 | A/Taiwan/T0826/2009          | Import from public-domain | Houng,H.-S.H.; Li,T.; Verratti,K.; Gong,H.; Zhou,Y.; Lipkin,W.I.; Street,C.; Seriwatana,J.; Lyons,A.G.; Keyes,J.; Yun,T.; Kuschner,R.A. |
| EPI215475 | NP  | Taiwan       | 2009-Jul-10 | EPI_ISL_61844 | A/Taiwan/T0826/2009          | Import from public-domain | Houng,H.-S.H.; Li,T.; Verratti,K.; Gong,H.; Zhou,Y.; Lipkin,W.I.; Street,C.; Seriwatana,J.; Lyons,A.G.; Keyes,J.; Yun,T.; Kuschner,R.A. |
| EPI215476 | NA  | Taiwan       | 2009-Jul-10 | EPI_ISL_61844 | A/Taiwan/T0826/2009          | Import from public-domain | Houng,H.-S.H.; Li,T.; Verratti,K.; Gong,H.; Zhou,Y.; Lipkin,W.I.; Street,C.; Seriwatana,J.; Lyons,A.G.; Keyes,J.; Yun,T.; Kuschner,R.A. |
| EPI215477 | MP  | Taiwan       | 2009-Jul-10 | EPI_ISL_61844 | A/Taiwan/T0826/2009          | Import from public-domain | Houng,H.-S.H.; Li,T.; Verratti,K.; Gong,H.; Zhou,Y.; Lipkin,W.I.; Street,C.; Seriwatana,J.; Lyons,A.G.; Keyes,J.; Yun,T.; Kuschner,R.A. |
| EPI215478 | NS  | Taiwan       | 2009-Jul-10 | EPI_ISL_61844 | A/Taiwan/T0826/2009          | Import from public-domain | Houng,H.-S.H.; Li,T.; Verratti,K.; Gong,H.; Zhou,Y.; Lipkin,W.I.; Street,C.; Seriwatana,J.; Lyons,A.G.; Keyes,J.; Yun,T.; Kuschner,R.A. |
| EPI215459 | PB2 | Dominican Re | 2009-Jun-25 | EPI_ISL_61841 | A/Santo Domingo/WR1068N/2009 | Import from public-domain | Houng,H.-S.H.; Li,T.; Verratti,K.; Gong,H.; Zhou,Y.; Lipkin,W.I.; Street,C.; Seriwatana,J.; Lyons,A.G.; Keyes,J.; Yun,T.; Kuschner,R.A. |
| EPI215460 | PB1 | Dominican Re | 2009-Jun-25 | EPI_ISL_61841 | A/Santo Domingo/WR1068N/2009 | Import from public-domain | Houng,H.-S.H.; Li,T.; Verratti,K.; Gong,H.; Zhou,Y.; Lipkin,W.I.; Street,C.; Seriwatana,J.; Lyons,A.G.; Keyes,J.; Yun,T.; Kuschner,R.A. |























































|           |     |          |             |               |                       |                           |                                                                                                                                           |
|-----------|-----|----------|-------------|---------------|-----------------------|---------------------------|-------------------------------------------------------------------------------------------------------------------------------------------|
| EPI214028 | PA  | Canada   | 2009-May-24 | EPI_ISL_61518 | A/Toronto/C0270/2009  | Import from public-domain | Eshaghi,A.; Alexander,D.C.; Gubbay,J.B.; Low,D.E.                                                                                         |
| EPI214029 | HA  | Canada   | 2009-May-24 | EPI_ISL_61518 | A/Toronto/C0270/2009  | Import from public-domain | Eshaghi,A.; Alexander,D.C.; Gubbay,J.B.; Low,D.E.                                                                                         |
| EPI214030 | NP  | Canada   | 2009-May-24 | EPI_ISL_61518 | A/Toronto/C0270/2009  | Import from public-domain | Eshaghi,A.; Alexander,D.C.; Gubbay,J.B.; Low,D.E.                                                                                         |
| EPI214031 | NA  | Canada   | 2009-May-24 | EPI_ISL_61518 | A/Toronto/C0270/2009  | Import from public-domain | Eshaghi,A.; Alexander,D.C.; Gubbay,J.B.; Low,D.E.                                                                                         |
| EPI214032 | MP  | Canada   | 2009-May-24 | EPI_ISL_61518 | A/Toronto/C0270/2009  | Import from public-domain | Eshaghi,A.; Alexander,D.C.; Gubbay,J.B.; Low,D.E.                                                                                         |
| EPI214033 | NS  | Canada   | 2009-May-24 | EPI_ISL_61518 | A/Toronto/C0270/2009  | Import from public-domain | Eshaghi,A.; Alexander,D.C.; Gubbay,J.B.; Low,D.E.                                                                                         |
| EPI214013 | HA  | Japan    | 2009-Jul-18 | EPI_ISL_61516 | A/Tokushima/2/2009    | Import from public-domain | Ujike,M.; Obuchi,M.; Tashiro,M.; Odagiri,T.                                                                                               |
| EPI214014 | NA  | Japan    | 2009-Jul-18 | EPI_ISL_61516 | A/Tokushima/2/2009    | Import from public-domain | Ujike,M.; Obuchi,M.; Tashiro,M.; Odagiri,T.                                                                                               |
| EPI214015 | PB1 | Japan    | 2009-Jul-18 | EPI_ISL_61516 | A/Tokushima/2/2009    | Import from public-domain | Ujike,M.; Obuchi,M.; Tashiro,M.; Odagiri,T.                                                                                               |
| EPI214016 | NS  | Japan    | 2009-Jul-18 | EPI_ISL_61516 | A/Tokushima/2/2009    | Import from public-domain | Ujike,M.; Obuchi,M.; Tashiro,M.; Odagiri,T.                                                                                               |
| EPI214017 | PB2 | Japan    | 2009-Jul-18 | EPI_ISL_61516 | A/Tokushima/2/2009    | Import from public-domain | Ujike,M.; Obuchi,M.; Tashiro,M.; Odagiri,T.                                                                                               |
| EPI214018 | PA  | Japan    | 2009-Jul-18 | EPI_ISL_61516 | A/Tokushima/2/2009    | Import from public-domain | Ujike,M.; Obuchi,M.; Tashiro,M.; Odagiri,T.                                                                                               |
| EPI215480 | NP  | Japan    | 2009-Jul-18 | EPI_ISL_61516 | A/Tokushima/2/2009    | Import from public-domain | Ujike,M.; Obuchi,M.; Tashiro,M.; Odagiri,T.                                                                                               |
| EPI215479 | MP  | Japan    | 2009-Jul-18 | EPI_ISL_61516 | A/Tokushima/2/2009    | Import from public-domain | Ujike,M.; Obuchi,M.; Tashiro,M.; Odagiri,T.                                                                                               |
| EPI214005 | PB2 | Thailand | 2009-Jun-17 | EPI_ISL_61515 | A/Thailand/CU-H9/2009 | Import from public-domain | Thongmee,C.; Makkoch,J.; Suwannakam,K.; Chieochamsin,T.; Payungpom,S.; Thawomsuk,N.; Praianantathavom,K.; Theamboonlers,A.; Poovorawan,Y. |
| EPI214006 | PB1 | Thailand | 2009-Jun-17 | EPI_ISL_61515 | A/Thailand/CU-H9/2009 | Import from public-domain | Thongmee,C.; Makkoch,J.; Suwannakam,K.; Chieochamsin,T.; Payungpom,S.; Thawomsuk,N.; Praianantathavom,K.; Theamboonlers,A.; Poovorawan,Y. |
| EPI214007 | PA  | Thailand | 2009-Jun-17 | EPI_ISL_61515 | A/Thailand/CU-H9/2009 | Import from public-domain | Thongmee,C.; Makkoch,J.; Suwannakam,K.; Chieochamsin,T.; Payungpom,S.; Thawomsuk,N.; Praianantathavom,K.; Theamboonlers,A.; Poovorawan,Y. |
| EPI214008 | HA  | Thailand | 2009-Jun-17 | EPI_ISL_61515 | A/Thailand/CU-H9/2009 | Import from public-domain | Thongmee,C.; Makkoch,J.; Suwannakam,K.; Chieochamsin,T.; Payungpom,S.; Thawomsuk,N.; Praianantathavom,K.; Theamboonlers,A.; Poovorawan,Y. |
| EPI214009 | NP  | Thailand | 2009-Jun-17 | EPI_ISL_61515 | A/Thailand/CU-H9/2009 | Import from public-domain | Thongmee,C.; Makkoch,J.; Suwannakam,K.; Chieochamsin,T.; Payungpom,S.; Thawomsuk,N.; Praianantathavom,K.; Theamboonlers,A.; Poovorawan,Y. |
| EPI214010 | NA  | Thailand | 2009-Jun-17 | EPI_ISL_61515 | A/Thailand/CU-H9/2009 | Import from public-domain | Thongmee,C.; Makkoch,J.; Suwannakam,K.; Chieochamsin,T.; Payungpom,S.; Thawomsuk,N.; Praianantathavom,K.; Theamboonlers,A.; Poovorawan,Y. |
| EPI214011 | MP  | Thailand | 2009-Jun-17 | EPI_ISL_61515 | A/Thailand/CU-H9/2009 | Import from public-domain | Thongmee,C.; Makkoch,J.; Suwannakam,K.; Chieochamsin,T.; Payungpom,S.; Thawomsuk,N.; Praianantathavom,K.; Theamboonlers,A.; Poovorawan,Y. |
| EPI214012 | NS  | Thailand | 2009-Jun-17 | EPI_ISL_61515 | A/Thailand/CU-H9/2009 | Import from public-domain | Thongmee,C.; Makkoch,J.; Suwannakam,K.; Chieochamsin,T.; Payungpom,S.; Thawomsuk,N.; Praianantathavom,K.; Theamboonlers,A.; Poovorawan,Y. |
| EPI213965 | PB2 | Thailand | 2009-Jun-13 | EPI_ISL_61510 | A/Thailand/CU-B5/2009 | Import from public-domain | Thongmee,C.; Makkoch,J.; Suwannakam,K.; Chieochamsin,T.; Payungpom,S.; Thawomsuk,N.; Praianantathavom,K.; Theamboonlers,A.; Poovorawan,Y. |
| EPI213966 | PB1 | Thailand | 2009-Jun-13 | EPI_ISL_61510 | A/Thailand/CU-B5/2009 | Import from public-domain | Thongmee,C.; Makkoch,J.; Suwannakam,K.; Chieochamsin,T.; Payungpom,S.; Thawomsuk,N.; Praianantathavom,K.; Theamboonlers,A.; Poovorawan,Y. |
| EPI213967 | PA  | Thailand | 2009-Jun-13 | EPI_ISL_61510 | A/Thailand/CU-B5/2009 | Import from public-domain | Thongmee,C.; Makkoch,J.; Suwannakam,K.; Chieochamsin,T.; Payungpom,S.; Thawomsuk,N.; Praianantathavom,K.; Theamboonlers,A.; Poovorawan,Y. |
| EPI213968 | HA  | Thailand | 2009-Jun-13 | EPI_ISL_61510 | A/Thailand/CU-B5/2009 | Import from public-domain | Thongmee,C.; Makkoch,J.; Suwannakam,K.; Chieochamsin,T.; Payungpom,S.; Thawomsuk,N.; Praianantathavom,K.; Theamboonlers,A.; Poovorawan,Y. |
| EPI213969 | NP  | Thailand | 2009-Jun-13 | EPI_ISL_61510 | A/Thailand/CU-B5/2009 | Import from public-domain | Thongmee,C.; Makkoch,J.; Suwannakam,K.; Chieochamsin,T.; Payungpom,S.; Thawomsuk,N.; Praianantathavom,K.; Theamboonlers,A.; Poovorawan,Y. |
| EPI213970 | NA  | Thailand | 2009-Jun-13 | EPI_ISL_61510 | A/Thailand/CU-B5/2009 | Import from public-domain | Thongmee,C.; Makkoch,J.; Suwannakam,K.; Chieochamsin,T.; Payungpom,S.; Thawomsuk,N.; Praianantathavom,K.; Theamboonlers,A.; Poovorawan,Y. |
| EPI213971 | MP  | Thailand | 2009-Jun-13 | EPI_ISL_61510 | A/Thailand/CU-B5/2009 | Import from public-domain | Thongmee,C.; Makkoch,J.; Suwannakam,K.; Chieochamsin,T.; Payungpom,S.; Thawomsuk,N.; Praianantathavom,K.; Theamboonlers,A.; Poovorawan,Y. |
| EPI213972 | NS  | Thailand | 2009-Jun-13 | EPI_ISL_61510 | A/Thailand/CU-B5/2009 | Import from public-domain | Thongmee,C.; Makkoch,J.; Suwannakam,K.; Chieochamsin,T.; Payungpom,S.; Thawomsuk,N.; Praianantathavom,K.; Theamboonlers,A.; Poovorawan,Y. |
| EPI213946 | PB2 | Taiwan   | 2009-Jun-01 | EPI_ISL_61505 | A/Taiwan/137/2009     | Import from public-domain | Tsao,K.-C.; Huang,Y.-L.; Mok,C.-K.; Huang,C.-G.; Lin,T.-Y.; Shih,S.-R.                                                                    |

|           |     |           |             |               |                         |                           |                                                                                                                                                   |
|-----------|-----|-----------|-------------|---------------|-------------------------|---------------------------|---------------------------------------------------------------------------------------------------------------------------------------------------|
| EPI213947 | PB1 | Taiwan    | 2009-Jun-01 | EPI_ISL_61505 | A/Taiwan/137/2009       | Import from public-domain | Tsao,K.-C.; Huang,Y.-L.; Mok,C.-K.; Huang,C.-G.; Lin,T.-Y.; Shih,S.-R.                                                                            |
| EPI213948 | PA  | Taiwan    | 2009-Jun-01 | EPI_ISL_61505 | A/Taiwan/137/2009       | Import from public-domain | Tsao,K.-C.; Huang,Y.-L.; Mok,C.-K.; Huang,C.-G.; Lin,T.-Y.; Shih,S.-R.                                                                            |
| EPI213949 | HA  | Taiwan    | 2009-Jun-01 | EPI_ISL_61505 | A/Taiwan/137/2009       | Import from public-domain | Tsao,K.-C.; Huang,Y.-L.; Mok,C.-K.; Huang,C.-G.; Lin,T.-Y.; Shih,S.-R.                                                                            |
| EPI213950 | NP  | Taiwan    | 2009-Jun-01 | EPI_ISL_61505 | A/Taiwan/137/2009       | Import from public-domain | Tsao,K.-C.; Huang,Y.-L.; Mok,C.-K.; Huang,C.-G.; Lin,T.-Y.; Shih,S.-R.                                                                            |
| EPI213951 | NA  | Taiwan    | 2009-Jun-01 | EPI_ISL_61505 | A/Taiwan/137/2009       | Import from public-domain | Tsao,K.-C.; Huang,Y.-L.; Mok,C.-K.; Huang,C.-G.; Lin,T.-Y.; Shih,S.-R.                                                                            |
| EPI213952 | MP  | Taiwan    | 2009-Jun-01 | EPI_ISL_61505 | A/Taiwan/137/2009       | Import from public-domain | Tsao,K.-C.; Huang,Y.-L.; Mok,C.-K.; Huang,C.-G.; Lin,T.-Y.; Shih,S.-R.                                                                            |
| EPI213953 | NS  | Taiwan    | 2009-Jun-01 | EPI_ISL_61505 | A/Taiwan/137/2009       | Import from public-domain | Tsao,K.-C.; Huang,Y.-L.; Mok,C.-K.; Huang,C.-G.; Lin,T.-Y.; Shih,S.-R.                                                                            |
| EPI213552 | PB2 | Singapore | 2009-Jun-20 | EPI_ISL_61442 | A/Singapore/ON305/2009  | Import from public-domain | Lee,C.W.H.; Koh,C.W.; Han,B.L.; Chan,Y.S.; Sung,W.-K.; Phauh,S.P.; Loh,P.L.; Meng,S.; Ng,K.Y.; Yong,T.Y.; Cui,L.; Lin,R.; Hibberd,M.L.; Wong,C.W. |
| EPI213553 | PB1 | Singapore | 2009-Jun-20 | EPI_ISL_61442 | A/Singapore/ON305/2009  | Import from public-domain | Lee,C.W.H.; Koh,C.W.; Han,B.L.; Chan,Y.S.; Sung,W.-K.; Phauh,S.P.; Loh,P.L.; Meng,S.; Ng,K.Y.; Yong,T.Y.; Cui,L.; Lin,R.; Hibberd,M.L.; Wong,C.W. |
| EPI213554 | PA  | Singapore | 2009-Jun-20 | EPI_ISL_61442 | A/Singapore/ON305/2009  | Import from public-domain | Lee,C.W.H.; Koh,C.W.; Han,B.L.; Chan,Y.S.; Sung,W.-K.; Phauh,S.P.; Loh,P.L.; Meng,S.; Ng,K.Y.; Yong,T.Y.; Cui,L.; Lin,R.; Hibberd,M.L.; Wong,C.W. |
| EPI213555 | HA  | Singapore | 2009-Jun-20 | EPI_ISL_61442 | A/Singapore/ON305/2009  | Import from public-domain | Lee,C.W.H.; Koh,C.W.; Han,B.L.; Chan,Y.S.; Sung,W.-K.; Phauh,S.P.; Loh,P.L.; Meng,S.; Ng,K.Y.; Yong,T.Y.; Cui,L.; Lin,R.; Hibberd,M.L.; Wong,C.W. |
| EPI213556 | NP  | Singapore | 2009-Jun-20 | EPI_ISL_61442 | A/Singapore/ON305/2009  | Import from public-domain | Lee,C.W.H.; Koh,C.W.; Han,B.L.; Chan,Y.S.; Sung,W.-K.; Phauh,S.P.; Loh,P.L.; Meng,S.; Ng,K.Y.; Yong,T.Y.; Cui,L.; Lin,R.; Hibberd,M.L.; Wong,C.W. |
| EPI213557 | NA  | Singapore | 2009-Jun-20 | EPI_ISL_61442 | A/Singapore/ON305/2009  | Import from public-domain | Lee,C.W.H.; Koh,C.W.; Han,B.L.; Chan,Y.S.; Sung,W.-K.; Phauh,S.P.; Loh,P.L.; Meng,S.; Ng,K.Y.; Yong,T.Y.; Cui,L.; Lin,R.; Hibberd,M.L.; Wong,C.W. |
| EPI213558 | MP  | Singapore | 2009-Jun-20 | EPI_ISL_61442 | A/Singapore/ON305/2009  | Import from public-domain | Lee,C.W.H.; Koh,C.W.; Han,B.L.; Chan,Y.S.; Sung,W.-K.; Phauh,S.P.; Loh,P.L.; Meng,S.; Ng,K.Y.; Yong,T.Y.; Cui,L.; Lin,R.; Hibberd,M.L.; Wong,C.W. |
| EPI213559 | NS  | Singapore | 2009-Jun-20 | EPI_ISL_61442 | A/Singapore/ON305/2009  | Import from public-domain | Lee,C.W.H.; Koh,C.W.; Han,B.L.; Chan,Y.S.; Sung,W.-K.; Phauh,S.P.; Loh,P.L.; Meng,S.; Ng,K.Y.; Yong,T.Y.; Cui,L.; Lin,R.; Hibberd,M.L.; Wong,C.W. |
| EPI190934 | MP  | Canada    | 2009-May-07 | EPI_ISL_33963 | A/Canada-SK/RV1797/2009 | Import from public-domain |                                                                                                                                                   |
| EPI190945 | NA  | Canada    | 2009-May-07 | EPI_ISL_33963 | A/Canada-SK/RV1797/2009 | Import from public-domain |                                                                                                                                                   |
| EPI190958 | NP  | Canada    | 2009-May-07 | EPI_ISL_33963 | A/Canada-SK/RV1797/2009 | Import from public-domain |                                                                                                                                                   |
| EPI190970 | NS  | Canada    | 2009-May-07 | EPI_ISL_33963 | A/Canada-SK/RV1797/2009 | Import from public-domain |                                                                                                                                                   |
| EPI190982 | PA  | Canada    | 2009-May-07 | EPI_ISL_33963 | A/Canada-SK/RV1797/2009 | Import from public-domain |                                                                                                                                                   |
| EPI190994 | PB1 | Canada    | 2009-May-07 | EPI_ISL_33963 | A/Canada-SK/RV1797/2009 | Import from public-domain |                                                                                                                                                   |
| EPI190910 | PB2 | Canada    | 2009-May-07 | EPI_ISL_33963 | A/Canada-SK/RV1797/2009 | Import from public-domain |                                                                                                                                                   |
| EPI190922 | HA  | Canada    | 2009-May-07 | EPI_ISL_33963 | A/Canada-SK/RV1797/2009 | Import from public-domain |                                                                                                                                                   |
| EPI190933 | MP  | Canada    | 2009-May-07 | EPI_ISL_33962 | A/Canada-SK/RV1794/2009 | Import from public-domain |                                                                                                                                                   |
| EPI190944 | NA  | Canada    | 2009-May-07 | EPI_ISL_33962 | A/Canada-SK/RV1794/2009 | Import from public-domain |                                                                                                                                                   |
| EPI190957 | NP  | Canada    | 2009-May-07 | EPI_ISL_33962 | A/Canada-SK/RV1794/2009 | Import from public-domain |                                                                                                                                                   |
| EPI190969 | NS  | Canada    | 2009-May-07 | EPI_ISL_33962 | A/Canada-SK/RV1794/2009 | Import from public-domain |                                                                                                                                                   |
| EPI190981 | PA  | Canada    | 2009-May-07 | EPI_ISL_33962 | A/Canada-SK/RV1794/2009 | Import from public-domain |                                                                                                                                                   |
| EPI190993 | PB1 | Canada    | 2009-May-07 | EPI_ISL_33962 | A/Canada-SK/RV1794/2009 | Import from public-domain |                                                                                                                                                   |
| EPI190909 | PB2 | Canada    | 2009-May-07 | EPI_ISL_33962 | A/Canada-SK/RV1794/2009 | Import from public-domain |                                                                                                                                                   |
| EPI190921 | HA  | Canada    | 2009-May-07 | EPI_ISL_33962 | A/Canada-SK/RV1794/2009 | Import from public-domain |                                                                                                                                                   |
| EPI190943 | NA  | Canada    | 2009-Apr-30 | EPI_ISL_33961 | A/Canada-SK/RV1788/2009 | Import from public-domain |                                                                                                                                                   |
| EPI190956 | NP  | Canada    | 2009-Apr-30 | EPI_ISL_33961 | A/Canada-SK/RV1788/2009 | Import from public-domain |                                                                                                                                                   |
| EPI190968 | NS  | Canada    | 2009-Apr-30 | EPI_ISL_33961 | A/Canada-SK/RV1788/2009 | Import from public-domain |                                                                                                                                                   |
| EPI190980 | PA  | Canada    | 2009-Apr-30 | EPI_ISL_33961 | A/Canada-SK/RV1788/2009 | Import from public-domain |                                                                                                                                                   |
| EPI190992 | PB1 | Canada    | 2009-Apr-30 | EPI_ISL_33961 | A/Canada-SK/RV1788/2009 | Import from public-domain |                                                                                                                                                   |
| EPI190908 | PB2 | Canada    | 2009-Apr-30 | EPI_ISL_33961 | A/Canada-SK/RV1788/2009 | Import from public-domain |                                                                                                                                                   |
| EPI190920 | HA  | Canada    | 2009-Apr-30 | EPI_ISL_33961 | A/Canada-SK/RV1788/2009 | Import from public-domain |                                                                                                                                                   |
| EPI190932 | MP  | Canada    | 2009-Apr-30 | EPI_ISL_33961 | A/Canada-SK/RV1788/2009 | Import from public-domain |                                                                                                                                                   |
| EPI190942 | NA  | Canada    | 2009-May-08 | EPI_ISL_33960 | A/Canada-PQ/RV1758/2009 | Import from public-domain |                                                                                                                                                   |
| EPI190955 | NP  | Canada    | 2009-May-08 | EPI_ISL_33960 | A/Canada-PQ/RV1758/2009 | Import from public-domain |                                                                                                                                                   |



















|           |     |               |             |               |                         |                           |                                                                       |
|-----------|-----|---------------|-------------|---------------|-------------------------|---------------------------|-----------------------------------------------------------------------|
| EPI178990 | PB1 | United States | 2009-Apr-27 | EPI_ISL_30061 | A/New York/1682/2009    | Import from public-domain |                                                                       |
| EPI178991 | PB2 | United States | 2009-Apr-27 | EPI_ISL_30061 | A/New York/1682/2009    | Import from public-domain |                                                                       |
| EPI179433 | PB2 | Korea, Republ | 2009-Apr-27 | EPI_ISL_30050 | A/Korea/01/2009         | Import from public-domain |                                                                       |
| EPI179434 | PA  | Korea, Republ | 2009-Apr-27 | EPI_ISL_30050 | A/Korea/01/2009         | Import from public-domain |                                                                       |
| EPI179435 | PB1 | Korea, Republ | 2009-Apr-27 | EPI_ISL_30050 | A/Korea/01/2009         | Import from public-domain |                                                                       |
| EPI179041 | NA  | Korea, Republ | 2009-Apr-27 | EPI_ISL_30050 | A/Korea/01/2009         | Import from public-domain |                                                                       |
| EPI178942 | HA  | Korea, Republ | 2009-Apr-27 | EPI_ISL_30050 | A/Korea/01/2009         | Import from public-domain |                                                                       |
| EPI178943 | NP  | Korea, Republ | 2009-Apr-27 | EPI_ISL_30050 | A/Korea/01/2009         | Import from public-domain |                                                                       |
| EPI178944 | MP  | Korea, Republ | 2009-Apr-27 | EPI_ISL_30050 | A/Korea/01/2009         | Import from public-domain |                                                                       |
| EPI178945 | NS  | Korea, Republ | 2009-Apr-27 | EPI_ISL_30050 | A/Korea/01/2009         | Import from public-domain |                                                                       |
| EPI178280 | HA  | Canada        | 2009-Apr-24 | EPI_ISL_29974 | A/Canada-NS/RV1535/2009 | Import from public-domain |                                                                       |
| EPI178283 | MP  | Canada        | 2009-Apr-24 | EPI_ISL_29974 | A/Canada-NS/RV1535/2009 | Import from public-domain |                                                                       |
| EPI178286 | NA  | Canada        | 2009-Apr-24 | EPI_ISL_29974 | A/Canada-NS/RV1535/2009 | Import from public-domain |                                                                       |
| EPI178289 | NP  | Canada        | 2009-Apr-24 | EPI_ISL_29974 | A/Canada-NS/RV1535/2009 | Import from public-domain |                                                                       |
| EPI178292 | NS  | Canada        | 2009-Apr-24 | EPI_ISL_29974 | A/Canada-NS/RV1535/2009 | Import from public-domain |                                                                       |
| EPI178295 | PA  | Canada        | 2009-Apr-24 | EPI_ISL_29974 | A/Canada-NS/RV1535/2009 | Import from public-domain |                                                                       |
| EPI178567 | PB2 | Canada        | 2009-Apr-24 | EPI_ISL_29974 | A/Canada-NS/RV1535/2009 | Import from public-domain |                                                                       |
| EPI178475 | PB1 | Canada        | 2009-Apr-24 | EPI_ISL_29974 | A/Canada-NS/RV1535/2009 | Import from public-domain |                                                                       |
| EPI178279 | PB2 | Mexico        | 2009-Apr-14 | EPI_ISL_29924 | A/Mexico/InDRE4487/2009 | Import from public-domain |                                                                       |
| EPI178281 | HA  | Mexico        | 2009-Apr-14 | EPI_ISL_29924 | A/Mexico/InDRE4487/2009 | Import from public-domain |                                                                       |
| EPI178284 | MP  | Mexico        | 2009-Apr-14 | EPI_ISL_29924 | A/Mexico/InDRE4487/2009 | Import from public-domain |                                                                       |
| EPI178287 | NA  | Mexico        | 2009-Apr-14 | EPI_ISL_29924 | A/Mexico/InDRE4487/2009 | Import from public-domain |                                                                       |
| EPI178290 | NP  | Mexico        | 2009-Apr-14 | EPI_ISL_29924 | A/Mexico/InDRE4487/2009 | Import from public-domain |                                                                       |
| EPI178293 | NS  | Mexico        | 2009-Apr-14 | EPI_ISL_29924 | A/Mexico/InDRE4487/2009 | Import from public-domain |                                                                       |
| EPI178296 | PA  | Mexico        | 2009-Apr-14 | EPI_ISL_29924 | A/Mexico/InDRE4487/2009 | Import from public-domain |                                                                       |
| EPI178299 | PB1 | Mexico        | 2009-Apr-14 | EPI_ISL_29924 | A/Mexico/InDRE4487/2009 | Import from public-domain |                                                                       |
| EPI178278 | PB2 | Canada        | 2009-Apr-24 | EPI_ISL_29923 | A/Canada-ON/RV1527/2009 | Import from public-domain |                                                                       |
| EPI178282 | HA  | Canada        | 2009-Apr-24 | EPI_ISL_29923 | A/Canada-ON/RV1527/2009 | Import from public-domain |                                                                       |
| EPI178285 | MP  | Canada        | 2009-Apr-24 | EPI_ISL_29923 | A/Canada-ON/RV1527/2009 | Import from public-domain |                                                                       |
| EPI178288 | NA  | Canada        | 2009-Apr-24 | EPI_ISL_29923 | A/Canada-ON/RV1527/2009 | Import from public-domain |                                                                       |
| EPI178291 | NP  | Canada        | 2009-Apr-24 | EPI_ISL_29923 | A/Canada-ON/RV1527/2009 | Import from public-domain |                                                                       |
| EPI178294 | NS  | Canada        | 2009-Apr-24 | EPI_ISL_29923 | A/Canada-ON/RV1527/2009 | Import from public-domain |                                                                       |
| EPI178297 | PA  | Canada        | 2009-Apr-24 | EPI_ISL_29923 | A/Canada-ON/RV1527/2009 | Import from public-domain |                                                                       |
| EPI178300 | PB1 | Canada        | 2009-Apr-24 | EPI_ISL_29923 | A/Canada-ON/RV1527/2009 | Import from public-domain |                                                                       |
| EPI185304 | HA  | Canada        | 2009-Apr-24 | EPI_ISL_29801 | A/Toronto/3141/2009     | Import from public-domain |                                                                       |
| EPI185305 | PB2 | Canada        | 2009-Apr-24 | EPI_ISL_29801 | A/Toronto/3141/2009     | Import from public-domain |                                                                       |
| EPI185306 | PB1 | Canada        | 2009-Apr-24 | EPI_ISL_29801 | A/Toronto/3141/2009     | Import from public-domain |                                                                       |
| EPI185307 | PA  | Canada        | 2009-Apr-24 | EPI_ISL_29801 | A/Toronto/3141/2009     | Import from public-domain |                                                                       |
| EPI185308 | NP  | Canada        | 2009-Apr-24 | EPI_ISL_29801 | A/Toronto/3141/2009     | Import from public-domain |                                                                       |
| EPI185309 | NA  | Canada        | 2009-Apr-24 | EPI_ISL_29801 | A/Toronto/3141/2009     | Import from public-domain |                                                                       |
| EPI185310 | MP  | Canada        | 2009-Apr-24 | EPI_ISL_29801 | A/Toronto/3141/2009     | Import from public-domain |                                                                       |
| EPI185311 | NS  | Canada        | 2009-Apr-24 | EPI_ISL_29801 | A/Toronto/3141/2009     | Import from public-domain |                                                                       |
| EPI297071 | PB2 | China         | 2009-Nov-10 | EPI_ISL_84667 | A/Jiangsu/S62/2009      | Import from public-domain | Luo,P.; Qi,X.; Cui,L.; Jiao,Y.; Tang,F.; Wang,H.                      |
| EPI297072 | PA  | China         | 2009-Nov-10 | EPI_ISL_84667 | A/Jiangsu/S62/2009      | Import from public-domain | Luo,P.; Qi,X.; Cui,L.; Jiao,Y.; Tang,F.; Wang,H.                      |
| EPI297073 | PB1 | China         | 2009-Nov-10 | EPI_ISL_84667 | A/Jiangsu/S62/2009      | Import from public-domain | Luo,P.; Qi,X.; Cui,L.; Jiao,Y.; Tang,F.; Wang,H.                      |
| EPI297068 | HA  | China         | 2009-Nov-10 | EPI_ISL_84667 | A/Jiangsu/S62/2009      | Import from public-domain | Luo,P.; Qi,X.; Cui,L.; Jiao,Y.; Tang,F.; Wang,H.                      |
| EPI297069 | NP  | China         | 2009-Nov-10 | EPI_ISL_84667 | A/Jiangsu/S62/2009      | Import from public-domain | Luo,P.; Qi,X.; Cui,L.; Jiao,Y.; Tang,F.; Wang,H.                      |
| EPI297070 | NA  | China         | 2009-Nov-10 | EPI_ISL_84667 | A/Jiangsu/S62/2009      | Import from public-domain | Luo,P.; Qi,X.; Cui,L.; Jiao,Y.; Tang,F.; Wang,H.                      |
| EPI297074 | MP  | China         | 2009-Nov-10 | EPI_ISL_84667 | A/Jiangsu/S62/2009      | Import from public-domain | Luo,P.; Qi,X.; Cui,L.; Jiao,Y.; Tang,F.; Wang,H.                      |
| EPI297075 | NS  | China         | 2009-Nov-10 | EPI_ISL_84667 | A/Jiangsu/S62/2009      | Import from public-domain | Luo,P.; Qi,X.; Cui,L.; Jiao,Y.; Tang,F.; Wang,H.                      |
| EPI300955 | NP  | China         | 2009-Nov-10 | EPI_ISL_84666 | A/Jiangsu/S61/2009      | Import from public-domain | Luo,P.; Qi,X.; Cui,L.; Tang,F.; Wang,H.                               |
| EPI300956 | NA  | China         | 2009-Nov-10 | EPI_ISL_84666 | A/Jiangsu/S61/2009      | Import from public-domain | Luo,P.; Qi,X.; Cui,L.; Tang,F.; Wang,H.                               |
| EPI300957 | PB2 | China         | 2009-Nov-10 | EPI_ISL_84666 | A/Jiangsu/S61/2009      | Import from public-domain | Luo,P.; Qi,X.; Cui,L.; Tang,F.; Wang,H.                               |
| EPI300958 | PA  | China         | 2009-Nov-10 | EPI_ISL_84666 | A/Jiangsu/S61/2009      | Import from public-domain | Luo,P.; Qi,X.; Cui,L.; Tang,F.; Wang,H.                               |
| EPI300959 | PB1 | China         | 2009-Nov-10 | EPI_ISL_84666 | A/Jiangsu/S61/2009      | Import from public-domain | Luo,P.; Qi,X.; Cui,L.; Tang,F.; Wang,H.                               |
| EPI300960 | MP  | China         | 2009-Nov-10 | EPI_ISL_84666 | A/Jiangsu/S61/2009      | Import from public-domain | Luo,P.; Qi,X.; Cui,L.; Tang,F.; Wang,H.                               |
| EPI300961 | NS  | China         | 2009-Nov-10 | EPI_ISL_84666 | A/Jiangsu/S61/2009      | Import from public-domain | Luo,P.; Qi,X.; Cui,L.; Tang,F.; Wang,H.                               |
| EPI297067 | HA  | China         | 2009-Nov-10 | EPI_ISL_84666 | A/Jiangsu/S61/2009      | Import from public-domain | Luo,P.; Qi,X.; Cui,L.; Tang,F.; Wang,H.                               |
| EPI280968 | NP  | Korea, Republ | 2009-Oct-01 | EPI_ISL_79814 | A/Korea/CJ68/2009       | Import from public-domain | Song,M.-S.; Lee,J.H.; Pascua,P.N.Q.; Baek,Y.H.; Kwon,H.-I.; Choi,Y.K. |
| EPI281088 | MP  | Korea, Republ | 2009-Oct-01 | EPI_ISL_79814 | A/Korea/CJ68/2009       | Import from public-domain | Song,M.-S.; Lee,J.H.; Pascua,P.N.Q.; Baek,Y.H.; Kwon,H.-I.; Choi,Y.K. |
| EPI281058 | HA  | Korea, Republ | 2009-Oct-01 | EPI_ISL_79814 | A/Korea/CJ68/2009       | Import from public-domain | Song,M.-S.; Lee,J.H.; Pascua,P.N.Q.; Baek,Y.H.; Kwon,H.-I.; Choi,Y.K. |











































































































































































































|           |     |               |             |               |                      |                           |                                                  |
|-----------|-----|---------------|-------------|---------------|----------------------|---------------------------|--------------------------------------------------|
| EPI223191 | PB1 | United States | 2009-Jun-17 | EPI_ISL_63819 | A/New York/4238/2009 | Import from public-domain | The NIAID Influenza Genome Sequencing Consortium |
| EPI223192 | PB2 | United States | 2009-Jun-17 | EPI_ISL_63819 | A/New York/4238/2009 | Import from public-domain | The NIAID Influenza Genome Sequencing Consortium |
| EPI211788 | NA  | China         | 2009-May-16 | EPI_ISL_60942 | A/Beijing/02/2009    | Import from public-domain | Yang,J.; Yang,F.; Jin,Q.                         |
| EPI211789 | NP  | China         | 2009-May-16 | EPI_ISL_60942 | A/Beijing/02/2009    | Import from public-domain | Yang,J.; Yang,F.; Jin,Q.                         |
| EPI211790 | NS  | China         | 2009-May-16 | EPI_ISL_60942 | A/Beijing/02/2009    | Import from public-domain | Yang,J.; Yang,F.; Jin,Q.                         |
| EPI211791 | PA  | China         | 2009-May-16 | EPI_ISL_60942 | A/Beijing/02/2009    | Import from public-domain | Yang,J.; Yang,F.; Jin,Q.                         |
| EPI211792 | PB1 | China         | 2009-May-16 | EPI_ISL_60942 | A/Beijing/02/2009    | Import from public-domain | Yang,J.; Yang,F.; Jin,Q.                         |
| EPI211793 | PB2 | China         | 2009-May-16 | EPI_ISL_60942 | A/Beijing/02/2009    | Import from public-domain | Yang,J.; Yang,F.; Jin,Q.                         |
| EPI211786 | HA  | China         | 2009-May-16 | EPI_ISL_60942 | A/Beijing/02/2009    | Import from public-domain | Yang,J.; Yang,F.; Jin,Q.                         |
| EPI211787 | MP  | China         | 2009-May-16 | EPI_ISL_60942 | A/Beijing/02/2009    | Import from public-domain | Yang,J.; Yang,F.; Jin,Q.                         |
| EPI211774 | PA  | Japan         | 2009-Jun-16 | EPI_ISL_60939 | A/Aichi/202/2009     | Import from public-domain | Ujike,M.; Obuchi,M.; Tashiro,M.; Odagiri,T.      |
| EPI211775 | PB2 | Japan         | 2009-Jun-16 | EPI_ISL_60939 | A/Aichi/202/2009     | Import from public-domain | Ujike,M.; Obuchi,M.; Tashiro,M.; Odagiri,T.      |
| EPI211776 | PB1 | Japan         | 2009-Jun-16 | EPI_ISL_60939 | A/Aichi/202/2009     | Import from public-domain | Ujike,M.; Obuchi,M.; Tashiro,M.; Odagiri,T.      |
| EPI211777 | NS  | Japan         | 2009-Jun-16 | EPI_ISL_60939 | A/Aichi/202/2009     | Import from public-domain | Ujike,M.; Obuchi,M.; Tashiro,M.; Odagiri,T.      |
| EPI211778 | HA  | Japan         | 2009-Jun-16 | EPI_ISL_60939 | A/Aichi/202/2009     | Import from public-domain | Ujike,M.; Obuchi,M.; Tashiro,M.; Odagiri,T.      |
| EPI211779 | NA  | Japan         | 2009-Jun-16 | EPI_ISL_60939 | A/Aichi/202/2009     | Import from public-domain | Ujike,M.; Obuchi,M.; Tashiro,M.; Odagiri,T.      |
| EPI215153 | NP  | Japan         | 2009-Jun-16 | EPI_ISL_60939 | A/Aichi/202/2009     | Import from public-domain | Ujike,M.; Obuchi,M.; Tashiro,M.; Odagiri,T.      |
| EPI215154 | MP  | Japan         | 2009-Jun-16 | EPI_ISL_60939 | A/Aichi/202/2009     | Import from public-domain | Ujike,M.; Obuchi,M.; Tashiro,M.; Odagiri,T.      |
| EPI211759 | HA  | United States | 2009-Apr-26 | EPI_ISL_60935 | A/New York/1669/2009 | Import from public-domain | The NIAID Influenza Genome Sequencing Consortium |
| EPI211760 | MP  | United States | 2009-Apr-26 | EPI_ISL_60935 | A/New York/1669/2009 | Import from public-domain | The NIAID Influenza Genome Sequencing Consortium |
| EPI211761 | NA  | United States | 2009-Apr-26 | EPI_ISL_60935 | A/New York/1669/2009 | Import from public-domain | The NIAID Influenza Genome Sequencing Consortium |
| EPI211762 | NP  | United States | 2009-Apr-26 | EPI_ISL_60935 | A/New York/1669/2009 | Import from public-domain | The NIAID Influenza Genome Sequencing Consortium |
| EPI211763 | NS  | United States | 2009-Apr-26 | EPI_ISL_60935 | A/New York/1669/2009 | Import from public-domain | The NIAID Influenza Genome Sequencing Consortium |
| EPI211764 | PA  | United States | 2009-Apr-26 | EPI_ISL_60935 | A/New York/1669/2009 | Import from public-domain | The NIAID Influenza Genome Sequencing Consortium |
| EPI211765 | PB1 | United States | 2009-Apr-26 | EPI_ISL_60935 | A/New York/1669/2009 | Import from public-domain | The NIAID Influenza Genome Sequencing Consortium |
| EPI211766 | PB2 | United States | 2009-Apr-26 | EPI_ISL_60935 | A/New York/1669/2009 | Import from public-domain | The NIAID Influenza Genome Sequencing Consortium |
| EPI185605 | MP  | Japan         | 2009-Jan-01 | EPI_ISL_32174 | A/Osaka/180/2009     | Import from public-domain |                                                  |
| EPI185606 | NP  | Japan         | 2009-Jan-01 | EPI_ISL_32174 | A/Osaka/180/2009     | Import from public-domain |                                                  |
| EPI185607 | NS  | Japan         | 2009-Jan-01 | EPI_ISL_32174 | A/Osaka/180/2009     | Import from public-domain |                                                  |
| EPI185608 | PA  | Japan         | 2009-Jan-01 | EPI_ISL_32174 | A/Osaka/180/2009     | Import from public-domain |                                                  |
| EPI185609 | PB1 | Japan         | 2009-Jan-01 | EPI_ISL_32174 | A/Osaka/180/2009     | Import from public-domain |                                                  |
| EPI185610 | PB2 | Japan         | 2009-Jan-01 | EPI_ISL_32174 | A/Osaka/180/2009     | Import from public-domain |                                                  |
| EPI184960 | HA  | Japan         | 2009-Jan-01 | EPI_ISL_32174 | A/Osaka/180/2009     | Import from public-domain |                                                  |
| EPI184961 | NA  | Japan         | 2009-Jan-01 | EPI_ISL_32174 | A/Osaka/180/2009     | Import from public-domain |                                                  |
| EPI184970 | PB2 | Japan         | 2009-Jun-16 | EPI_ISL_31862 | A/Utsunomiya/2/2009  | Import from public-domain |                                                  |
| EPI184971 | HA  | Japan         | 2009-Jun-16 | EPI_ISL_31862 | A/Utsunomiya/2/2009  | Import from public-domain |                                                  |
| EPI184972 | MP  | Japan         | 2009-Jun-16 | EPI_ISL_31862 | A/Utsunomiya/2/2009  | Import from public-domain |                                                  |
| EPI184973 | NA  | Japan         | 2009-Jun-16 | EPI_ISL_31862 | A/Utsunomiya/2/2009  | Import from public-domain |                                                  |
| EPI184974 | NP  | Japan         | 2009-Jun-16 | EPI_ISL_31862 | A/Utsunomiya/2/2009  | Import from public-domain |                                                  |
| EPI184975 | NS  | Japan         | 2009-Jun-16 | EPI_ISL_31862 | A/Utsunomiya/2/2009  | Import from public-domain |                                                  |
| EPI184976 | PA  | Japan         | 2009-Jun-16 | EPI_ISL_31862 | A/Utsunomiya/2/2009  | Import from public-domain |                                                  |
| EPI184977 | PB1 | Japan         | 2009-Jun-16 | EPI_ISL_31862 | A/Utsunomiya/2/2009  | Import from public-domain |                                                  |
| EPI184962 | HA  | Japan         | 2009-Jun-11 | EPI_ISL_31861 | A/Sapporo/1/2009     | Import from public-domain |                                                  |
| EPI184963 | MP  | Japan         | 2009-Jun-11 | EPI_ISL_31861 | A/Sapporo/1/2009     | Import from public-domain |                                                  |
| EPI184964 | NA  | Japan         | 2009-Jun-11 | EPI_ISL_31861 | A/Sapporo/1/2009     | Import from public-domain |                                                  |
| EPI184965 | NP  | Japan         | 2009-Jun-11 | EPI_ISL_31861 | A/Sapporo/1/2009     | Import from public-domain |                                                  |
| EPI184966 | NS  | Japan         | 2009-Jun-11 | EPI_ISL_31861 | A/Sapporo/1/2009     | Import from public-domain |                                                  |
| EPI184967 | PA  | Japan         | 2009-Jun-11 | EPI_ISL_31861 | A/Sapporo/1/2009     | Import from public-domain |                                                  |
| EPI184968 | PB1 | Japan         | 2009-Jun-11 | EPI_ISL_31861 | A/Sapporo/1/2009     | Import from public-domain |                                                  |
| EPI184969 | PB2 | Japan         | 2009-Jun-11 | EPI_ISL_31861 | A/Sapporo/1/2009     | Import from public-domain |                                                  |
| EPI184957 | PA  | Japan         | 2009-Jun-13 | EPI_ISL_31859 | A/Kagoshima/1/2009   | Import from public-domain |                                                  |
| EPI184958 | PB1 | Japan         | 2009-Jun-13 | EPI_ISL_31859 | A/Kagoshima/1/2009   | Import from public-domain |                                                  |
| EPI184959 | PB2 | Japan         | 2009-Jun-13 | EPI_ISL_31859 | A/Kagoshima/1/2009   | Import from public-domain |                                                  |
| EPI184952 | HA  | Japan         | 2009-Jun-13 | EPI_ISL_31859 | A/Kagoshima/1/2009   | Import from public-domain |                                                  |
| EPI184953 | MP  | Japan         | 2009-Jun-13 | EPI_ISL_31859 | A/Kagoshima/1/2009   | Import from public-domain |                                                  |
| EPI184954 | NA  | Japan         | 2009-Jun-13 | EPI_ISL_31859 | A/Kagoshima/1/2009   | Import from public-domain |                                                  |
| EPI184955 | NP  | Japan         | 2009-Jun-13 | EPI_ISL_31859 | A/Kagoshima/1/2009   | Import from public-domain |                                                  |
| EPI184956 | NS  | Japan         | 2009-Jun-13 | EPI_ISL_31859 | A/Kagoshima/1/2009   | Import from public-domain |                                                  |
| EPI184944 | HA  | Japan         | 2009-Jun-18 | EPI_ISL_31858 | A/Iwate/2/2009       | Import from public-domain |                                                  |
| EPI184945 | MP  | Japan         | 2009-Jun-18 | EPI_ISL_31858 | A/Iwate/2/2009       | Import from public-domain |                                                  |
| EPI184946 | NA  | Japan         | 2009-Jun-18 | EPI_ISL_31858 | A/Iwate/2/2009       | Import from public-domain |                                                  |
| EPI184947 | NP  | Japan         | 2009-Jun-18 | EPI_ISL_31858 | A/Iwate/2/2009       | Import from public-domain |                                                  |
| EPI184948 | NS  | Japan         | 2009-Jun-18 | EPI_ISL_31858 | A/Iwate/2/2009       | Import from public-domain |                                                  |
| EPI184949 | PA  | Japan         | 2009-Jun-18 | EPI_ISL_31858 | A/Iwate/2/2009       | Import from public-domain |                                                  |

|           |     |               |             |               |                            |                           |  |
|-----------|-----|---------------|-------------|---------------|----------------------------|---------------------------|--|
| EPI184950 | PB1 | Japan         | 2009-Jun-18 | EPI_ISL_31858 | A/Iwate/2/2009             | Import from public-domain |  |
| EPI184951 | PB2 | Japan         | 2009-Jun-18 | EPI_ISL_31858 | A/Iwate/2/2009             | Import from public-domain |  |
| EPI185599 | MP  | Japan         | 2009-Jun-09 | EPI_ISL_31857 | A/Iwate/1/2009             | Import from public-domain |  |
| EPI185600 | NS  | Japan         | 2009-Jun-09 | EPI_ISL_31857 | A/Iwate/1/2009             | Import from public-domain |  |
| EPI185601 | NP  | Japan         | 2009-Jun-09 | EPI_ISL_31857 | A/Iwate/1/2009             | Import from public-domain |  |
| EPI185602 | PA  | Japan         | 2009-Jun-09 | EPI_ISL_31857 | A/Iwate/1/2009             | Import from public-domain |  |
| EPI185603 | PB1 | Japan         | 2009-Jun-09 | EPI_ISL_31857 | A/Iwate/1/2009             | Import from public-domain |  |
| EPI185604 | PB2 | Japan         | 2009-Jun-09 | EPI_ISL_31857 | A/Iwate/1/2009             | Import from public-domain |  |
| EPI184942 | HA  | Japan         | 2009-Jun-09 | EPI_ISL_31857 | A/Iwate/1/2009             | Import from public-domain |  |
| EPI184943 | NA  | Japan         | 2009-Jun-09 | EPI_ISL_31857 | A/Iwate/1/2009             | Import from public-domain |  |
| EPI184934 | HA  | Japan         | 2009-Jun-23 | EPI_ISL_31856 | A/Fukushima/1/2009         | Import from public-domain |  |
| EPI184935 | MP  | Japan         | 2009-Jun-23 | EPI_ISL_31856 | A/Fukushima/1/2009         | Import from public-domain |  |
| EPI184936 | NA  | Japan         | 2009-Jun-23 | EPI_ISL_31856 | A/Fukushima/1/2009         | Import from public-domain |  |
| EPI184937 | NP  | Japan         | 2009-Jun-23 | EPI_ISL_31856 | A/Fukushima/1/2009         | Import from public-domain |  |
| EPI184938 | NS  | Japan         | 2009-Jun-23 | EPI_ISL_31856 | A/Fukushima/1/2009         | Import from public-domain |  |
| EPI184939 | PA  | Japan         | 2009-Jun-23 | EPI_ISL_31856 | A/Fukushima/1/2009         | Import from public-domain |  |
| EPI184940 | PB1 | Japan         | 2009-Jun-23 | EPI_ISL_31856 | A/Fukushima/1/2009         | Import from public-domain |  |
| EPI184941 | PB2 | Japan         | 2009-Jun-23 | EPI_ISL_31856 | A/Fukushima/1/2009         | Import from public-domain |  |
| EPI184926 | HA  | Japan         | 2009-Jun-11 | EPI_ISL_31855 | A/Akita/1/2009             | Import from public-domain |  |
| EPI184927 | MP  | Japan         | 2009-Jun-11 | EPI_ISL_31855 | A/Akita/1/2009             | Import from public-domain |  |
| EPI184928 | NA  | Japan         | 2009-Jun-11 | EPI_ISL_31855 | A/Akita/1/2009             | Import from public-domain |  |
| EPI184929 | NP  | Japan         | 2009-Jun-11 | EPI_ISL_31855 | A/Akita/1/2009             | Import from public-domain |  |
| EPI184931 | PA  | Japan         | 2009-Jun-11 | EPI_ISL_31855 | A/Akita/1/2009             | Import from public-domain |  |
| EPI184932 | PB1 | Japan         | 2009-Jun-11 | EPI_ISL_31855 | A/Akita/1/2009             | Import from public-domain |  |
| EPI184933 | PB2 | Japan         | 2009-Jun-11 | EPI_ISL_31855 | A/Akita/1/2009             | Import from public-domain |  |
| EPI211780 | NS  | Japan         | 2009-Jun-11 | EPI_ISL_31855 | A/Akita/1/2009             | Import from public-domain |  |
| EPI184917 | HA  | China         | 2009-Jan-01 | EPI_ISL_31853 | A/Zhejiang/DTID-ZJU01/2009 | Import from public-domain |  |
| EPI184918 | MP  | China         | 2009-Jan-01 | EPI_ISL_31853 | A/Zhejiang/DTID-ZJU01/2009 | Import from public-domain |  |
| EPI184919 | NA  | China         | 2009-Jan-01 | EPI_ISL_31853 | A/Zhejiang/DTID-ZJU01/2009 | Import from public-domain |  |
| EPI184920 | NP  | China         | 2009-Jan-01 | EPI_ISL_31853 | A/Zhejiang/DTID-ZJU01/2009 | Import from public-domain |  |
| EPI184921 | NS  | China         | 2009-Jan-01 | EPI_ISL_31853 | A/Zhejiang/DTID-ZJU01/2009 | Import from public-domain |  |
| EPI184922 | PA  | China         | 2009-Jan-01 | EPI_ISL_31853 | A/Zhejiang/DTID-ZJU01/2009 | Import from public-domain |  |
| EPI184923 | PB1 | China         | 2009-Jan-01 | EPI_ISL_31853 | A/Zhejiang/DTID-ZJU01/2009 | Import from public-domain |  |
| EPI186133 | PB2 | China         | 2009-Jan-01 | EPI_ISL_31853 | A/Zhejiang/DTID-ZJU01/2009 | Import from public-domain |  |
| EPI184670 | PB2 | Dominican Rep | 2009-May-24 | EPI_ISL_31673 | A/Santo Domingo/572N/2009  | Import from public-domain |  |
| EPI184671 | PB1 | Dominican Rep | 2009-May-24 | EPI_ISL_31673 | A/Santo Domingo/572N/2009  | Import from public-domain |  |
| EPI184672 | PA  | Dominican Rep | 2009-May-24 | EPI_ISL_31673 | A/Santo Domingo/572N/2009  | Import from public-domain |  |
| EPI184674 | NP  | Dominican Rep | 2009-May-24 | EPI_ISL_31673 | A/Santo Domingo/572N/2009  | Import from public-domain |  |
| EPI184675 | NA  | Dominican Rep | 2009-May-24 | EPI_ISL_31673 | A/Santo Domingo/572N/2009  | Import from public-domain |  |
| EPI184676 | MP  | Dominican Rep | 2009-May-24 | EPI_ISL_31673 | A/Santo Domingo/572N/2009  | Import from public-domain |  |
| EPI184677 | NS  | Dominican Rep | 2009-May-24 | EPI_ISL_31673 | A/Santo Domingo/572N/2009  | Import from public-domain |  |
| EPI186244 | HA  | Dominican Rep | 2009-May-24 | EPI_ISL_31673 | A/Santo Domingo/572N/2009  | Import from public-domain |  |
| EPI184653 | PB2 | Italy         | 2009-Jun-14 | EPI_ISL_31668 | A/Italy/85/2009            | Import from public-domain |  |
| EPI184654 | PB1 | Italy         | 2009-Jun-14 | EPI_ISL_31668 | A/Italy/85/2009            | Import from public-domain |  |
| EPI184655 | PA  | Italy         | 2009-Jun-14 | EPI_ISL_31668 | A/Italy/85/2009            | Import from public-domain |  |
| EPI184656 | HA  | Italy         | 2009-Jun-14 | EPI_ISL_31668 | A/Italy/85/2009            | Import from public-domain |  |
| EPI184657 | NP  | Italy         | 2009-Jun-14 | EPI_ISL_31668 | A/Italy/85/2009            | Import from public-domain |  |
| EPI184658 | NA  | Italy         | 2009-Jun-14 | EPI_ISL_31668 | A/Italy/85/2009            | Import from public-domain |  |
| EPI184659 | MP  | Italy         | 2009-Jun-14 | EPI_ISL_31668 | A/Italy/85/2009            | Import from public-domain |  |
| EPI184660 | NS  | Italy         | 2009-Jun-14 | EPI_ISL_31668 | A/Italy/85/2009            | Import from public-domain |  |
| EPI184598 | PB2 | China         | 2009-Jun-06 | EPI_ISL_31653 | A/Shanghai/143T/2009       | Import from public-domain |  |
| EPI184599 | PB1 | China         | 2009-Jun-06 | EPI_ISL_31653 | A/Shanghai/143T/2009       | Import from public-domain |  |
| EPI184600 | NS  | China         | 2009-Jun-06 | EPI_ISL_31653 | A/Shanghai/143T/2009       | Import from public-domain |  |
| EPI184601 | MP  | China         | 2009-Jun-06 | EPI_ISL_31653 | A/Shanghai/143T/2009       | Import from public-domain |  |
| EPI186846 | NA  | China         | 2009-Jun-06 | EPI_ISL_31653 | A/Shanghai/143T/2009       | Import from public-domain |  |
| EPI186847 | PA  | China         | 2009-Jun-06 | EPI_ISL_31653 | A/Shanghai/143T/2009       | Import from public-domain |  |
| EPI186848 | HA  | China         | 2009-Jun-06 | EPI_ISL_31653 | A/Shanghai/143T/2009       | Import from public-domain |  |
| EPI186850 | NP  | China         | 2009-Jun-06 | EPI_ISL_31653 | A/Shanghai/143T/2009       | Import from public-domain |  |
| EPI184279 | NP  | Luxembourg    | 2009-Jun-01 | EPI_ISL_31545 | A/Luxembourg/43/2009       | Import from public-domain |  |
| EPI184280 | NS  | Luxembourg    | 2009-Jun-01 | EPI_ISL_31545 | A/Luxembourg/43/2009       | Import from public-domain |  |
| EPI184281 | PB1 | Luxembourg    | 2009-Jun-01 | EPI_ISL_31545 | A/Luxembourg/43/2009       | Import from public-domain |  |
| EPI184282 | PB2 | Luxembourg    | 2009-Jun-01 | EPI_ISL_31545 | A/Luxembourg/43/2009       | Import from public-domain |  |
| EPI184283 | PA  | Luxembourg    | 2009-Jun-01 | EPI_ISL_31545 | A/Luxembourg/43/2009       | Import from public-domain |  |
| EPI184284 | HA  | Luxembourg    | 2009-Jun-01 | EPI_ISL_31545 | A/Luxembourg/43/2009       | Import from public-domain |  |

Ujike, M.; Obuchi, M.; Tashiro, M.; Odagiri, T.  
Ujike, M.; Obuchi, M.; Tashiro, M.; Odagiri, T.































































|           |     |                           |             |               |                      |                           |                                                                                                                                                                                                                                      |
|-----------|-----|---------------------------|-------------|---------------|----------------------|---------------------------|--------------------------------------------------------------------------------------------------------------------------------------------------------------------------------------------------------------------------------------|
| EPI252309 | MP  | Canada                    | 2009-Aug-24 | EPI_ISL_73444 | A/Ontario/10016/2009 | Import from public-domain | Eshaghi,A.; Alexander,D.C.; Rosenfeld,P.; Ma,J.H.; Gubbay,J.B.; Low,D.E.                                                                                                                                                             |
| EPI252310 | NS  | Canada                    | 2009-Aug-24 | EPI_ISL_73444 | A/Ontario/10016/2009 | Import from public-domain | Eshaghi,A.; Alexander,D.C.; Rosenfeld,P.; Ma,J.H.; Gubbay,J.B.; Low,D.E.                                                                                                                                                             |
| EPI252303 | PB2 | Canada                    | 2009-Aug-24 | EPI_ISL_73444 | A/Ontario/10016/2009 | Import from public-domain | Eshaghi,A.; Alexander,D.C.; Rosenfeld,P.; Ma,J.H.; Gubbay,J.B.; Low,D.E.                                                                                                                                                             |
| EPI252304 | PB1 | Canada                    | 2009-Aug-24 | EPI_ISL_73444 | A/Ontario/10016/2009 | Import from public-domain | Eshaghi,A.; Alexander,D.C.; Rosenfeld,P.; Ma,J.H.; Gubbay,J.B.; Low,D.E.                                                                                                                                                             |
| EPI252305 | PA  | Canada                    | 2009-Aug-24 | EPI_ISL_73444 | A/Ontario/10016/2009 | Import from public-domain | Eshaghi,A.; Alexander,D.C.; Rosenfeld,P.; Ma,J.H.; Gubbay,J.B.; Low,D.E.                                                                                                                                                             |
| EPI252306 | HA  | Canada                    | 2009-Aug-24 | EPI_ISL_73444 | A/Ontario/10016/2009 | Import from public-domain | Eshaghi,A.; Alexander,D.C.; Rosenfeld,P.; Ma,J.H.; Gubbay,J.B.; Low,D.E.                                                                                                                                                             |
| EPI252307 | NP  | Canada                    | 2009-Aug-24 | EPI_ISL_73444 | A/Ontario/10016/2009 | Import from public-domain | Eshaghi,A.; Alexander,D.C.; Rosenfeld,P.; Ma,J.H.; Gubbay,J.B.; Low,D.E.                                                                                                                                                             |
| EPI227936 | PB2 | Russian Feder 2009-Nov-01 |             | EPI_ISL_65051 | A/Russia/19/2009     | Import from public-domain | Alexeev,D.; Chukin,M.M.; Generozov,E.V.; Govorun,V.M.; Gribanov,O.; Ilina,E.N.; Klimova,E.A.; Kondratov,I.; Kostin,P.A.; Kostryukova,E.S.; Larin,A.E.; Lazarev,V.N.; Levitskii,S.A.; Prilipov,A.G.; Yuschuk,N.D.; Zakhajevskaya,N.B. |
| EPI227937 | PB1 | Russian Feder 2009-Nov-01 |             | EPI_ISL_65051 | A/Russia/19/2009     | Import from public-domain | Alexeev,D.; Chukin,M.M.; Generozov,E.V.; Govorun,V.M.; Gribanov,O.; Ilina,E.N.; Klimova,E.A.; Kondratov,I.; Kostin,P.A.; Kostryukova,E.S.; Larin,A.E.; Lazarev,V.N.; Levitskii,S.A.; Prilipov,A.G.; Yuschuk,N.D.; Zakhajevskaya,N.B. |
| EPI227938 | PA  | Russian Feder 2009-Nov-01 |             | EPI_ISL_65051 | A/Russia/19/2009     | Import from public-domain | Alexeev,D.; Chukin,M.M.; Generozov,E.V.; Govorun,V.M.; Gribanov,O.; Ilina,E.N.; Klimova,E.A.; Kondratov,I.; Kostin,P.A.; Kostryukova,E.S.; Larin,A.E.; Lazarev,V.N.; Levitskii,S.A.; Prilipov,A.G.; Yuschuk,N.D.; Zakhajevskaya,N.B. |
| EPI227939 | HA  | Russian Feder 2009-Nov-01 |             | EPI_ISL_65051 | A/Russia/19/2009     | Import from public-domain | Alexeev,D.; Chukin,M.M.; Generozov,E.V.; Govorun,V.M.; Gribanov,O.; Ilina,E.N.; Klimova,E.A.; Kondratov,I.; Kostin,P.A.; Kostryukova,E.S.; Larin,A.E.; Lazarev,V.N.; Levitskii,S.A.; Prilipov,A.G.; Yuschuk,N.D.; Zakhajevskaya,N.B. |
| EPI227940 | NP  | Russian Feder 2009-Nov-01 |             | EPI_ISL_65051 | A/Russia/19/2009     | Import from public-domain | Alexeev,D.; Chukin,M.M.; Generozov,E.V.; Govorun,V.M.; Gribanov,O.; Ilina,E.N.; Klimova,E.A.; Kondratov,I.; Kostin,P.A.; Kostryukova,E.S.; Larin,A.E.; Lazarev,V.N.; Levitskii,S.A.; Prilipov,A.G.; Yuschuk,N.D.; Zakhajevskaya,N.B. |
| EPI227941 | NA  | Russian Feder 2009-Nov-01 |             | EPI_ISL_65051 | A/Russia/19/2009     | Import from public-domain | Alexeev,D.; Chukin,M.M.; Generozov,E.V.; Govorun,V.M.; Gribanov,O.; Ilina,E.N.; Klimova,E.A.; Kondratov,I.; Kostin,P.A.; Kostryukova,E.S.; Larin,A.E.; Lazarev,V.N.; Levitskii,S.A.; Prilipov,A.G.; Yuschuk,N.D.; Zakhajevskaya,N.B. |
| EPI227942 | MP  | Russian Feder 2009-Nov-01 |             | EPI_ISL_65051 | A/Russia/19/2009     | Import from public-domain | Alexeev,D.; Chukin,M.M.; Generozov,E.V.; Govorun,V.M.; Gribanov,O.; Ilina,E.N.; Klimova,E.A.; Kondratov,I.; Kostin,P.A.; Kostryukova,E.S.; Larin,A.E.; Lazarev,V.N.; Levitskii,S.A.; Prilipov,A.G.; Yuschuk,N.D.; Zakhajevskaya,N.B. |
| EPI227943 | NS  | Russian Feder 2009-Nov-01 |             | EPI_ISL_65051 | A/Russia/19/2009     | Import from public-domain | Alexeev,D.; Chukin,M.M.; Generozov,E.V.; Govorun,V.M.; Gribanov,O.; Ilina,E.N.; Klimova,E.A.; Kondratov,I.; Kostin,P.A.; Kostryukova,E.S.; Larin,A.E.; Lazarev,V.N.; Levitskii,S.A.; Prilipov,A.G.; Yuschuk,N.D.; Zakhajevskaya,N.B. |
| EPI234582 | PB2 | Russian Feder 2009-Nov-01 |             | EPI_ISL_65051 | A/Russia/19/2009     | Import from public-domain | Alexeev,D.; Chukin,M.M.; Generozov,E.V.; Govorun,V.M.; Gribanov,O.; Ilina,E.N.; Klimova,E.A.; Kondratov,I.; Kostin,P.A.; Kostryukova,E.S.; Larin,A.E.; Lazarev,V.N.; Levitskii,S.A.; Prilipov,A.G.; Yuschuk,N.D.; Zakhajevskaya,N.B. |
| EPI234583 | PB1 | Russian Feder 2009-Nov-01 |             | EPI_ISL_65051 | A/Russia/19/2009     | Import from public-domain | Alexeev,D.; Chukin,M.M.; Generozov,E.V.; Govorun,V.M.; Gribanov,O.; Ilina,E.N.; Klimova,E.A.; Kondratov,I.; Kostin,P.A.; Kostryukova,E.S.; Larin,A.E.; Lazarev,V.N.; Levitskii,S.A.; Prilipov,A.G.; Yuschuk,N.D.; Zakhajevskaya,N.B. |
| EPI234584 | PA  | Russian Feder 2009-Nov-01 |             | EPI_ISL_65051 | A/Russia/19/2009     | Import from public-domain | Alexeev,D.; Chukin,M.M.; Generozov,E.V.; Govorun,V.M.; Gribanov,O.; Ilina,E.N.; Klimova,E.A.; Kondratov,I.; Kostin,P.A.; Kostryukova,E.S.; Larin,A.E.; Lazarev,V.N.; Levitskii,S.A.; Prilipov,A.G.; Yuschuk,N.D.; Zakhajevskaya,N.B. |
| EPI234585 | HA  | Russian Feder 2009-Nov-01 |             | EPI_ISL_65051 | A/Russia/19/2009     | Import from public-domain | Alexeev,D.; Chukin,M.M.; Generozov,E.V.; Govorun,V.M.; Gribanov,O.; Ilina,E.N.; Klimova,E.A.; Kondratov,I.; Kostin,P.A.; Kostryukova,E.S.; Larin,A.E.; Lazarev,V.N.; Levitskii,S.A.; Prilipov,A.G.; Yuschuk,N.D.; Zakhajevskaya,N.B. |









































|           |     |               |             |               |                      |                           |
|-----------|-----|---------------|-------------|---------------|----------------------|---------------------------|
| EPI186642 | NP  | United States | 2009-Apr-22 | EPI_ISL_32630 | A/Brawley/40081/2009 | Import from public-domain |
| EPI186643 | NA  | United States | 2009-Apr-22 | EPI_ISL_32630 | A/Brawley/40081/2009 | Import from public-domain |
| EPI186644 | MP  | United States | 2009-Apr-22 | EPI_ISL_32630 | A/Brawley/40081/2009 | Import from public-domain |
| EPI186645 | NS  | United States | 2009-Apr-22 | EPI_ISL_32630 | A/Brawley/40081/2009 | Import from public-domain |
| EPI186235 | PB2 | Italy         | 2009-Jun-17 | EPI_ISL_32461 | A/Italy/127/2009     | Import from public-domain |
| EPI186236 | PB1 | Italy         | 2009-Jun-17 | EPI_ISL_32461 | A/Italy/127/2009     | Import from public-domain |
| EPI186237 | PA  | Italy         | 2009-Jun-17 | EPI_ISL_32461 | A/Italy/127/2009     | Import from public-domain |
| EPI186238 | HA  | Italy         | 2009-Jun-17 | EPI_ISL_32461 | A/Italy/127/2009     | Import from public-domain |
| EPI186239 | NP  | Italy         | 2009-Jun-17 | EPI_ISL_32461 | A/Italy/127/2009     | Import from public-domain |
| EPI186240 | NA  | Italy         | 2009-Jun-17 | EPI_ISL_32461 | A/Italy/127/2009     | Import from public-domain |
| EPI186241 | MP  | Italy         | 2009-Jun-17 | EPI_ISL_32461 | A/Italy/127/2009     | Import from public-domain |
| EPI186242 | NS  | Italy         | 2009-Jun-17 | EPI_ISL_32461 | A/Italy/127/2009     | Import from public-domain |
| EPI186227 | PB1 | Russian Feder | 2009-Jul-09 | EPI_ISL_32460 | A/Moscow/IIV04/2009  | Import from public-domain |
| EPI186228 | PB2 | Russian Feder | 2009-Jul-09 | EPI_ISL_32460 | A/Moscow/IIV04/2009  | Import from public-domain |
| EPI186229 | PA  | Russian Feder | 2009-Jul-09 | EPI_ISL_32460 | A/Moscow/IIV04/2009  | Import from public-domain |
| EPI186230 | NP  | Russian Feder | 2009-Jul-09 | EPI_ISL_32460 | A/Moscow/IIV04/2009  | Import from public-domain |
| EPI186231 | HA  | Russian Feder | 2009-Jul-09 | EPI_ISL_32460 | A/Moscow/IIV04/2009  | Import from public-domain |
| EPI186232 | NA  | Russian Feder | 2009-Jul-09 | EPI_ISL_32460 | A/Moscow/IIV04/2009  | Import from public-domain |
| EPI186233 | MP  | Russian Feder | 2009-Jul-09 | EPI_ISL_32460 | A/Moscow/IIV04/2009  | Import from public-domain |
| EPI186234 | NS  | Russian Feder | 2009-Jul-09 | EPI_ISL_32460 | A/Moscow/IIV04/2009  | Import from public-domain |
| EPI186125 | PB2 | Canada        | 2009-May-26 | EPI_ISL_32414 | A/Toronto/0462/2009  | Import from public-domain |
| EPI186126 | PB1 | Canada        | 2009-May-26 | EPI_ISL_32414 | A/Toronto/0462/2009  | Import from public-domain |
| EPI186127 | PA  | Canada        | 2009-May-26 | EPI_ISL_32414 | A/Toronto/0462/2009  | Import from public-domain |
| EPI186128 | HA  | Canada        | 2009-May-26 | EPI_ISL_32414 | A/Toronto/0462/2009  | Import from public-domain |
| EPI186129 | NP  | Canada        | 2009-May-26 | EPI_ISL_32414 | A/Toronto/0462/2009  | Import from public-domain |
| EPI186130 | NA  | Canada        | 2009-May-26 | EPI_ISL_32414 | A/Toronto/0462/2009  | Import from public-domain |
| EPI186131 | MP  | Canada        | 2009-May-26 | EPI_ISL_32414 | A/Toronto/0462/2009  | Import from public-domain |
| EPI186132 | NS  | Canada        | 2009-May-26 | EPI_ISL_32414 | A/Toronto/0462/2009  | Import from public-domain |
